Research article

1 **Stochastic asymmetric repartition of lytic machinery in dividing human**

2 **CD8<sup>+</sup> T cells generates heterogeneous killing behavior**

3

4 Fanny Lafouresse<sup>1,#</sup>, Romain Jugele<sup>1,#</sup>, Sabina Müller<sup>1</sup>, Marine Doineau<sup>2</sup>, Valérie Duplan-

5 Eche<sup>3</sup>, Eric Espinosa<sup>1</sup>, Marie-Pierre Puissegur<sup>1</sup>, Sébastien Gadat<sup>2</sup> and Salvatore

6 Valitutti<sup>1,4\*</sup>

7

8 <sup>1</sup>INSERM U1037, Centre de Recherche en Cancérologie de Toulouse (CRCT), Université

9 de Toulouse III-Paul Sabatier, 31057 Toulouse, France. Team: Molecular dynamics of

10 lymphocyte interaction, « Equipe labellisée Ligue Nationale contre le Cancer 2018 »

11 <sup>2</sup>Mathematics of decision making and statistics, Toulouse School of Economics, UMR

12 5604, Université Toulouse 1 Capitole, France

13 <sup>3</sup>INSERM, UMR1043, Centre de Physiopathologie de Toulouse Purpan, 31024 Toulouse,

14 France

15 <sup>4</sup>Department of Pathology, Institut Universitaire du Cancer-Oncopole de Toulouse, 31059

16 Toulouse, France.

17 # These authors contributed equally to this work

18 \*Corresponding author: [fanny.lafouresse@inserm.fr](mailto:fanny.lafouresse@inserm.fr)

19

20

21

22

23

24 **Abstract**

25 Cytotoxic immune cells are endowed with a high degree of heterogeneity in their lytic  
26 function, but how this heterogeneity is generated is still an open question. We therefore  
27 investigated if human CD8<sup>+</sup> T cells could segregate their lytic components during  
28 telophase, using imaging flow cytometry, confocal microscopy and live cell imaging. We  
29 show that CD107a<sup>+</sup>-intracellular vesicles, perforin and granzyme B unevenly segregate in  
30 a constant fraction of telophasic CD8<sup>+</sup> T cells during each division round. Mathematical  
31 modeling posits that unequal lytic molecule inheritance by daughter cells results from the  
32 random distribution of lytic granules on the two sides of the cleavage furrow. Finally, we  
33 establish that the level of lytic compartment in individual CTL dictates CTL killing  
34 capacity.

35 Together, our results show the stochastic asymmetric distribution of effector molecules in  
36 dividing CD8<sup>+</sup> T cells. They propose uneven mitotic repartition of pre-packaged lytic  
37 components as a mechanism generating non-hereditary functional heterogeneity in  
38 cytotoxic cells.

39

40 **Key words:** human lymphocytes; Cytotoxic T lymphocytes (CTL); lytic granules; cell  
41 division; immunological synapse; lysosomal-associated membrane proteins

42

43

44

45

46

47

48

## 49 **Introduction**

50 Heterogeneity and plasticity of lymphocyte function are key components of successful  
51 adaptive immune responses. Accordingly, several studies put forth the notion that  
52 individual mouse and human lymphocytes exhibit high degrees of heterogeneity in both  
53 their phenotypic and functional characteristics (Beuneu et al., 2010; Buchholz et al., 2016,  
54 2013; Ganesan et al., 2017; Kumar et al., 2018; Lemaitre et al., 2013; Newell et al., 2012).  
55 Functional heterogeneity is not limited to cell differentiation and acquisition of phenotypic  
56 and functional characteristics, but also involves late steps of immune cell responses such  
57 as CD8<sup>+</sup> cytotoxic T lymphocyte (CTL)- and natural killer (NK) cell- mediated cytotoxicity  
58 (Guldevall et al., 2016; Halle et al., 2016). Accordingly, we have previously shown that  
59 human CTL belonging to the same clonal population exhibit heterogeneity in their lytic  
60 function during sustained interaction with target cells (Vasconcelos et al., 2015). While,  
61 some CTL kill a limited number of target cells, others emerge as super-killer cells.  
62 One proposed mechanism of functional heterogeneity generation in T lymphocytes is  
63 asymmetric cell division (ACD). ACD is a key mechanism to generate cell heterogeneity  
64 in biology. It plays a crucial role in embryogenesis by allowing the formation of two  
65 distinct cells from a single mother cell (Dewey et al., 2015; Knoblich, 2008). In  
66 immunology, ACD has been proposed as a process allowing mouse naive T lymphocytes  
67 to divide into short-lived effector T cells and memory T cells, after TCR-triggered division  
68 (Arsenio et al., 2015, 2014; Chang et al., 2011, 2007).  
69 In the present work, we investigated the possibility that, in dividing human CD8<sup>+</sup> T cells,  
70 heterogeneous distribution of molecules relevant for cytotoxic function into nascent  
71 daughter cells might contribute to CTL killing heterogeneity.

72 To address this question, we employed imaging flow cytometry, 3D confocal laser  
73 scanning microscopy, live-cell imaging and mathematical modeling to investigate whether  
74 and how lytic components might differently segregate in telophase.

75 Our results show that both freshly isolated human peripheral blood CD8<sup>+</sup> T cells and clonal  
76 CTL exhibit a heterogeneous repartition of lytic machinery in telophase during TCR-  
77 triggered proliferation which is not part of a classical ACD process. Furthermore, we  
78 demonstrate that heterogeneous lytic compartment repartition resets at each round of CTL  
79 division and is consequently stationary but not hereditary. Finally, we show that the level  
80 of lytic granule expression in individual CTL influences their killing ability.

81 Together, our results unveil a mechanism of stochastic uneven repartition of pre-packaged  
82 lytic components within intracellular vesicles that generates functional plasticity during  
83 division and contributes to lytic function heterogeneity of individual cells belonging to  
84 clonal populations.

85

86

87

88

89

90

91

92

93

94



95 **Results**

96 *Imaging flow cytometry reveals uneven repartition of lytic machinery in dividing human*

97 *CD8<sup>+</sup> T cells*

98 To investigate the mechanisms leading to the generation of CTL exhibiting heterogeneous  
99 killing ability, we first measured the distribution of lytic machinery components in dividing  
100 human CD8<sup>+</sup> T cells. Telophase is the *bona fide* cell cycle phase where unambiguous  
101 measurement of molecular repartition in nascent daughter cells is performed (Chang et al.,  
102 2007; Filby et al., 2011). Lytic granule repartition during human CD8<sup>+</sup> T cell division was  
103 evaluated using imaging flow cytometry, a technique that combines the advantages of both  
104 flow cytometry and microscopy (Basiji and O’Gorman, 2015; Doan et al., 2018; Hritzo et  
105 al., 2018). This approach allowed us to collect and analyze a substantial number of cells  
106 and to visualize and assess the repartition of molecules of interest within individual cells  
107 that were unambiguously identified as being in telophase. Cells in telophase were identified  
108 using a computer-assisted gating strategy, on the basis of nuclear and tubulin stainings  
109 (**Figure S1**). Nuclear staining with SYTOXorange<sup>®</sup> identified bi-nucleated cells with  
110 elongated shape corresponding to cells in the late steps of division (anaphase and  
111 telophase). The cells in telophase were identified (and discriminated from possible cellular  
112 doublets) on the basis of tubulin staining that allowed us to highlight their midbodies.  
113 **Figure S2 A** shows how masks were applied to delimit the cells and measure the  
114 fluorescence intensity of markers of interest in the nascent daughter cells. Cells were also  
115 stained with Cell Trace Violet<sup>®</sup> (CTV), a probe that labels total cell proteins. As previously  
116 reported (Filby et al., 2011), we observed that total proteins distribute in nascent daughter  
117 cells within a range of 40-60% (**Figure S2 B**). In our study, CTV staining served both as a

118 marker of cell division (allowing us to identify cells in the different division rounds (Quah  
119 and Parish, 2012)), and to define total protein repartition in telophase (Filby et al., 2011).  
120 This procedure minimized the possibility that, if some images were taken slightly on an  
121 angle, with one daughter cell slightly more in focus than the other, the markers of interest  
122 would artificially appear as asymmetric. Indeed, asymmetric distribution was defined as  
123 cells in telophase in which repartition of the marker of interest in the nascent daughter cells  
124 was beyond the 40-60 % limits observed for CTV repartition (**Figure S2 B**). In addition,  
125 to further exclude the possibility of measurement artifacts, we verified individual cells by  
126 eyes and included in the analysis only cells in telophase that were on a even plane.  
127 Specificity of staining for the various markers was validated (see Material and Methods  
128 section).

129 In a first approach, CD8<sup>+</sup> T cells freshly isolated from healthy donor blood samples were  
130 stimulated with immobilized anti-CD3/anti-CD28/ICAM-1 for 72 hours. Anti-CD3/anti-  
131 CD28/ICAM-1 stimulation resulted in activation of human CD8<sup>+</sup> T cells as shown by cell  
132 proliferation and CD137 up-regulation (**Figure S3**). Repartition of the lysosomal marker  
133 CD107a was investigated in cells in telophase. As shown in **Figure 1A**, while CTV  
134 distribution ranged between 40-60% in dividing T cells, 23 % of telophasic CD8<sup>+</sup> T cells  
135 exhibited an uneven distribution of CD107a<sup>+</sup> vesicles overcoming the 40-60% CTV range.  
136 We next investigated the distribution in telophase of lytic components such as perforin and  
137 granzyme B (GrzB), molecules known to be pre-stored in lytic granules. As shown in  
138 **Figure 1B** and **C**, perforin and GrzB also unevenly segregated into the two nascent  
139 daughter cells in telophase, indicating that daughter cells received a heterogeneous quantity  
140 of lytic components.

141 The slope of the linear regression curve for the distribution of CD107a, perforin and GrzB  
142 as compared to CTV was close to 0.1, indicating that these 3 molecules distributed  
143 independently from total proteins.

144 To define whether uneven repartition of lytic components could be observed in fully  
145 differentiated cells, such as memory cells, we investigated CD107a and perforin  
146 distribution in telophase in purified human memory CD8<sup>+</sup> T cells. This analysis showed  
147 that also memory CD8<sup>+</sup> T cells exhibited uneven repartition of CD107a and perforin in  
148 telophase (**Figure S4**).

149 We next investigated whether lytic machinery asymmetric repartition could also be  
150 observed in activated CD8<sup>+</sup> T cell populations composed of monoclonal cells such as  
151 antigen-specific CTL clones. To address this question, we investigated CD107a repartition  
152 in CTL undergoing cell division. For this study, we activated CTL clones using  
153 immobilized anti-CD3/anti-CD28/ICAM-1 for 72 hours. We opted for this stimulation  
154 condition since, in preparatory experiments, we observed that conjugation of CTL with  
155 cognate target cells, results (during the 72 hours culture) in the creation of cellular clumps  
156 and debris due to CTL killing activity, thus making it difficult and potentially misleading  
157 to analyze cells by image flow cytometry and conventional microscopy. As shown in  
158 **Figure 1D**, we observed that in clonal CTL undergoing cell division, 15% of the two  
159 nascent daughter cells in telophase exhibited uneven distribution of CD107a, thus  
160 confirming and extending observations obtained using CD8<sup>+</sup> peripheral blood T cells.

161 Taken together, the above results indicate that a lysosomal-associated membrane protein  
162 known to be a marker of lytic granules and effector molecules involved in CTL lytic  
163 function, unevenly segregate in 10-23 % of individual human CD8<sup>+</sup> T cells undergoing

164 division.

165

166 *Confocal laser scanning microscopy confirms uneven repartition of lytic machinery in*

167 *dividing CD8<sup>+</sup> T cells*

168 Image flow cytometry allows the unambiguously identification and capture of rare events

169 within a cell population, such as cells in telophase, albeit exhibiting a lower resolution

170 when compared to classical imaging methods. This notion prompted us to confirm results

171 obtained using imaging flow cytometry, with additional methods.

172 We therefore used 3D confocal laser scanning microscopy to measure CD107a content in

173 telophasic CD8<sup>+</sup> T cells following stimulation with immobilized anti-CD3/anti-

174 CD28/ICAM-1. Although this approach allowed us to collect a relatively small number of

175 cells in telophase (n=61 compared to n=908 obtained by image flow cytometry), it revealed

176 that 27% of the CD8<sup>+</sup> T cells in telophase exhibited uneven repartition of CD107a, above

177 a 1.5 threshold (corresponding to the 40-60% ranged used in imaging flow cytometry

178 experiments) (**Figure 2A**). **Figure 2B** depicts the maximum intensity projection (MIP) of

179 a z-stack of images on which measurements of fluorescence intensity were performed (left

180 panel) and a central z-section (right panel). The asymmetry of CD107a repartition in

181 nascent daughter cells is better appreciated by looking at the 3D reconstructions of the

182 dividing cell (**Movie 1**).

183 Together, the above results indicate that confocal laser scanning microscopy provides

184 results that reinforce those we obtained using imaging flow cytometry and supports the

185 finding that lytic granules undergo uneven repartition in ~20% of dividing CD8<sup>+</sup> T cells.

186

187 *Uneven repartition of lytic machinery is not accompanied by asymmetric segregation of*  
188 *fate determining transcription factors and does not require a polarity cue*

189 The observation that lytic components were unevenly inherited in daughter cells prompted  
190 us to investigate whether this process was somehow related to mechanisms of cell fate  
191 determining ACD, a process reported to play a role in mouse naive T lymphocytes  
192 differentiation (Arsenio et al., 2015, 2014; Kaminski et al., 2016; Pham et al., 2014).  
193 Indeed, it has been reported that ACD can result in the generation of one daughter cell  
194 predisposed to become a short-lived effector cell (harboring a high level of the transcription  
195 factors T-bet and c-myc, and of GrzB) and one daughter cell predisposed to become a  
196 memory T cell (Widjaja et al., 2017). We investigated whether uneven repartition of fate  
197 determining transcription factors T-bet and c-myc (Chang et al., 2011; Verbist et al., 2016),  
198 might occur in telophase in freshly isolated peripheral blood CD8<sup>+</sup> T cells stimulated with  
199 anti-CD3/anti-CD28/ICAM-1 for 72 hours. As shown in **Figure 3A** and **B**, both T-bet and  
200 c-myc did not unevenly segregate into the two nascent daughter cells during telophase.  
201 Moreover, the slope of the linear regression curve for the distribution of T-bet and c-myc  
202 as compared to CTV was close to 1, indicating that the repartition of these 2 molecules in  
203 telophase followed that of total proteins.

204 To further define whether the observed uneven repartition of lytic components was or was  
205 not related to ACD, we investigated whether uneven repartition of lytic components was  
206 dependent on a polarity cue (e.g. localized TCR stimulation) as previously described for  
207 ACD (Arsenio et al., 2015; Pham et al., 2014). **Figure 4A** and **B** shows that a polarity cue  
208 was not required to induce uneven distribution of lytic molecules, since comparable  
209 CD107a<sup>+</sup> vesicles segregation was observed in peripheral blood CD8<sup>+</sup> T cells stimulated

210 by either immobilized (anti-CD3/anti-CD28/ICAM-1) or soluble (PMA + ionomycin)  
211 stimuli.

212 Overall, the above results demonstrate that uneven partitioning of lytic compartment in  
213 telophase is not associated with asymmetric segregation of fate determining transcription  
214 factors. Moreover, a polarity cue is not required. All in all, the above results show that, in  
215 human CD8<sup>+</sup> T cells, lytic machinery uneven repartition is not related to described  
216 mechanisms of fate determining ACD.

217

218 *Asymmetric repartition of CD107a<sup>+</sup> vesicles reset at each division event and generates*  
219 *heterogeneous daughter cells*

220 We next investigated whether lytic machinery uneven repartition occurred during  
221 subsequent divisions and whether this process could be involved in preserving lytic  
222 machinery heterogeneity within CD8<sup>+</sup> T cell populations.

223 We considered the cells in the different rounds of division (identified by different peaks of  
224 CTV dilution, **Figure S3**) and analyzed CD107a repartition in telophasic cells. This  
225 analysis showed that, in all division rounds considered, a comparable percentage of cells  
226 underwent heterogeneous repartition of CD107a (**Figure 5A and B**).

227 A complementary observation indicated that the heterogeneity process is stationary but not  
228 hereditary: e.g. a daughter cell originating from a heterogeneous division has a constant  
229 stationary probability to produce a new uneven division. We arrived to this conclusion by  
230 generating CD107a fluorescence intensity (CD107a-FI) density curves of all telophasic  
231 cells having undergone 0, 1 or 2 mitosis. Cells in telophase showing unequal CD107a-FI  
232 repartition were then plotted on these curves (**Figure 5C**). The  $\chi^2$  statistical test showed

233 that these cells were randomly and independently distributed on the CD107a-FI density  
234 curves, supporting the hypothesis that there is no inheritance in the decision to divide  
235 unevenly (see Materials and Methods section).

236 We next asked whether this process might create a drift in lytic compartment content in  
237 daughter cells leading to the emergence of cellular subsets expressing higher or lower  
238 levels of CD107a. To address this question, we analyzed the total CD107a-FI in all G1  
239 cells (either undivided or following each division round). As shown in **Figure 5D**, the total  
240 CD107a-FI appeared to be broadly similar in the different rounds of division in the whole  
241 populations, suggesting that uneven repartition of CD107a, in a relatively constant fraction  
242 of cells at each division round, does not lead to the emergence of well-defined cellular  
243 subsets expressing higher or lower levels of CD107a. We employed the Kolmogorov-  
244 Smirnov goodness of fit test to determine whether the different curves followed the same  
245 distribution or not. The test strongly rejected the hypothesis that the CD107a expression  
246 curves follow the same distribution during the first two division rounds (see Materials and  
247 Methods section), indicating that during these division events randomly heterogeneous  
248 populations were generated. Nevertheless, our test also showed that the Kolmogorov  
249 distance decreased when the number of divisions increased, indicating that CD107a-FI  
250 density distribution seems to be convergent with a higher number of divisions. To define  
251 where variability was located in the curves, we employed the  $\chi^2$  test. The test showed that  
252 variability was distributed all over the curves (i.e. for all the CD107a-FI). Together,  
253 Kolmogorov-Smirnov goodness of fit and  $\chi^2$  tests revealed a non-stationary variability in  
254 the content of CD107a<sup>+</sup> vesicles in CD8<sup>+</sup> T cells during early division events.

255 Taken together, the above results indicate that asymmetric distribution of CD107a<sup>+</sup> vesicles  
256 in telophase is not limited to the first division, but it is rather a stochastic process, inherent  
257 to each division, that perpetuates variability in daughter cells.

258

259 *Lytic granules randomly distribute on the two sides of the cleavage furrow*

260 The gain direct information about the possibility that lytic components might stochastically  
261 distribute in nascent daughter cells, we visualized lytic granule repartition during division  
262 in individual CTL transfected with mCherry-tagged GrzB mRNA, by live cell microscopy.  
263 mCherry-tagged GrzB showed no preferential localization within cell cytosol at the  
264 different phases of the division and appeared to randomly partition into the two nascent  
265 daughter cells. In some cases, nascent daughter cells exhibited approximately similar  
266 repartition of lytic granules (**Figure 6A, Movie 2**), in some other cases lytic granule  
267 repartition appeared to be rather asymmetric (**Figure 6B, Movie 3**). Furthermore, we  
268 investigated cell division in 4D (3D plus time). Sorted CD8<sup>+</sup> T cells in G2/M phase were  
269 loaded with LysoTracker Red (LTR) to stain their late endosomal lysosomal vesicles (of  
270 which lytic granules are an important fraction (Faroudi et al., 2003)). Nascent daughter  
271 cells were imaged to monitor distribution of LTR<sup>+</sup> vesicles and measure the integrated  
272 fluorescence intensity. An example of one CD8<sup>+</sup> T cell distributing LTR<sup>+</sup> vesicles in a  
273 symmetric fashion during division is shown in **Figure 6C** and **Movie 4** (LTR distribution  
274 ranged within 40-60% at all time points measured). One CD8<sup>+</sup> T cell that distributed in an  
275 asymmetry fashion LTR<sup>+</sup> vesicles is shown in **Figure 6D** and **Movie 5** (LTR distribution  
276 ranged above or below 40-60% at all time points measured). Additional examples of cells  
277 dividing in symmetric and asymmetric fashion are shown in **Figure S5** and **Movie 6**.



278 Together, the above data support the hypothesis that uneven repartition of lytic granules  
279 during division is a stochastic event.

280 Finally, we used a computational approach to establish whether the above-described  
281 process might be linked to a random repartition of lytic components into the two nascent  
282 daughter cells. We calculated the probability that individual vesicles might fall on the two  
283 sides of the division furrow. Using stimulated emission depletion (STED) on CTL stained  
284 for GrzB, we estimated that 14 to 65 lytic granules are contained within individual CTL.  
285 We next calculated the probability to obtain an asymmetric distribution of lytic granules  
286 (*e.g.* a repartition of the granules into the two daughter cells out of the 40-60% range). This  
287 computation is naturally handled with a binomial modeling for the behavior of the  
288 population of  $n$  granules (see Materials and Methods section). This analysis showed that  
289 for  $n < 100$  the probabilities that individual particles distribute asymmetrically on the two  
290 sides of the cleavage furrow are relatively high (**Figure 6E**). These values are compatible  
291 with a significant probability of stochastic uneven repartition of lytic granules in telophase.  
292 Taken together, cell imaging and computational results strongly suggest that the observed  
293 stationary unequal distribution of lytic granules in telophase is the result of a stochastic  
294 repartition of particulate cytosolic structures on the two sides of the cleavage furrow in  
295 dividing cells.

296

297 *The level of lytic granule content in individual CTL dictates CTL killing capacity*

298 To assess the consequences of an uneven distribution of lytic compartment on CTL-  
299 mediated cytotoxicity, we investigated cytotoxic efficacy in CTL expressing high and low

300 lytic granule content. To this end, clonal CTL were loaded with LysoTracker blue, and cells  
301 containing high (LysoTracker<sup>High</sup>) and low (LysoTracker<sup>Low</sup>) levels were FACS sorted.  
302 As shown in **Figure 7A**, sorted LysoTracker<sup>High</sup> and LysoTracker<sup>Low</sup> CTL populations  
303 maintained their difference in LysoTracker staining at least 24 hours after cell sorting. The  
304 cytotoxic efficacy of sorted CTL populations was compared at different effector:target  
305 (E:T) ratios by measuring the percentage of killed targets (7-AAD positive targets). For  
306 each ratio, LysoTracker<sup>High</sup> CTL were more efficient than LysoTracker<sup>Low</sup> CTL in exerting  
307 cytotoxicity (**Figure 7B-C**), although basal killing (in the absence of peptide stimulation)  
308 was comparable between LysoTracker<sup>High</sup> and LysoTracker<sup>Low</sup> CTL (**Figure 7C**).  
309 The above results show that lytic granule content is associated with killing efficacy.  
310 Together, they suggest that stochastic uneven distribution of lytic vesicles in dividing CD8<sup>+</sup>  
311 T cells impact killing behavior.

312 **Discussion**

313 In the present study we found that, in both freshly isolated peripheral blood CD8<sup>+</sup> T cells  
314 and clonal CTL, ~ 20 percent of telophasic cells undergoes asymmetric distribution of the  
315 lytic compartment into the two daughter cells. Our results establish that CD8<sup>+</sup> killing  
316 capacity is associated to lytic compartment level and strongly suggest that uneven lytic  
317 machinery repartition produces CD8<sup>+</sup> T cell populations with heterogeneous killing  
318 capacities.

319 We used imaging flow cytometry, a technique that combines the advantages of flow  
320 cytometry and microscopy and allows the detection and analysis of rare cells within whole  
321 cell populations on the basis of their morphological and staining characteristics (Basiji and  
322 O’Gorman, 2015; Doan et al., 2018; Hritzo et al., 2018). We thus acquired and analyzed a  
323 significant number of relatively rare events of T cell divisions by precisely identifying cells  
324 in telophase. The use of CTV distribution as a parameter of global protein repartition in  
325 telophase together with the acquisition of an important number of cell divisions strengthens  
326 our analysis. In addition, we investigated lytic granule repartition in dividing CD8<sup>+</sup> T cells  
327 by 3D confocal laser scanning microscopy and 4D live cell imaging. These techniques  
328 allowed visualization of lytic granule repartition in telophase with a high time/space  
329 resolution and strengthened imaging flow cytometry data by providing unambiguous  
330 visualization of lytic granule partitioning.

331 Our results demonstrate that the uneven lytic machinery distribution is not related to ACD.  
332 In mouse T lymphocytes, ACD has been reported as a mechanism contributing to the  
333 generation of effector/memory daughter cells following division of an individual naive T  
334 cell in response to polarizing cues (Arsenio et al., 2015; Chang et al., 2007). Establishment

335 of asymmetry has been associated to the uneven inheritance by daughter cells of  
336 transcription factors such as c-Myc and T-bet known for their role in the induction of  
337 metabolic reprogramming and in the acquisition of T cell effector function respectively  
338 (Chang et al., 2011; Verbist et al., 2016). Following the original observation of uneven  
339 repartition of proteasomes in dividing mouse CD4<sup>+</sup> T cells leading to asymmetric  
340 degradation of T-bet in daughter cells (Chang et al., 2011), additional cellular effectors  
341 including metabolic and signaling pathways have been found to be implicated in fate  
342 determining ACD in mouse naive T lymphocytes (Kaminski et al., 2016; Pollizzi et al.,  
343 2016; Verbist et al., 2016). Our results, by showing that lytic granule repartition is not  
344 accompanied by a detectable asymmetric segregation of T-bet and c-Myc and does not  
345 require a polarity cue, suggest that the lytic machinery uneven distribution observed in  
346 human CD8<sup>+</sup> T cells is not related to previously described ACD. Although we could not  
347 detect an asymmetric repartition of classical lineage-determining transcription factor, in  
348 our models, this observation does not exclude the possibility that ACD might play a role  
349 in the differentiation of human naive T cells into effector and memory subsets during initial  
350 antigen specific immune responses. It is therefore possible that the discrepancy between  
351 our results and previous studies on ACD in mouse T lymphocytes arises from the different  
352 nature of the cells involved in the study. It should also be noted that, beside ACD, other  
353 mechanisms can contribute to the generation of different T lymphocyte populations from  
354 naive lymphocytes and, more in general, can play a role in T lymphocyte heterogeneity.  
355 Alternative models postulate that lymphocyte differentiation might be achieved via the  
356 accumulation of progressive differences among daughter cells due to variation in the  
357 quantity of the inherited proteins (Buchholz et al., 2016; Cobbold et al., 2018; Gerlach et

358 al., 2013; Girel and Crauste, 2019; Pham et al., 2014; Rohr et al., 2014; Schumacher et al.,  
359 2010).

360

361 A puzzling question is how asymmetric distribution of lytic components in telophase is  
362 generated. Our results provide a stepping-stone to answer this question. First,  
363 mathematical analysis of our imaging flow cytometry data provides an interpretation of  
364 our results that is compatible with a stochastic distribution of lytic components during  
365 cell division. On one hand, mathematical analysis shows that the process of asymmetric  
366 distribution is stationary in terms of the fraction of involved cells: e.g. occurs always on a  
367 similar percentage of cells, at each division round, in different experiments and following  
368 different stimuli. On the other hand, the heterogeneity process, although stationary is not  
369 hereditary: e.g. a daughter cell originating from a heterogeneous division has a constant  
370 stationary probability to produce a new uneven division. Second, live-cell imaging shows  
371 lytic granule distribution during mitosis. We did not observe any specific pattern of lytic  
372 granule repartition (polarization at the membrane or close to the cleavage furrow) before  
373 or during cell division. Instead, lytic compartments appeared randomly distributed in cell  
374 cytosol. Our observations are consistent with the mathematical modeling of intracellular  
375 vesicle distribution showing the high probability of an uneven distribution of a relatively  
376 small quantity of granules. In other words, pre-packaged molecular components within a  
377 few relatively big vesicles might have higher probability to be asymmetrically partitioned  
378 in telophase than molecular components dispersed throughout the cytosol.

379 Together, our results point out a mechanism of heterogeneity generation that is purely  
380 stochastic and might be a general mechanism for generating heterogeneity in dividing cells.

381 The possibility that particulate material is unevenly distributed in telophase into two  
382 nascent daughter cells has been proposed for other organelles and in other cellular systems  
383 (Bergeland et al., 2001; Carlton et al., 2020; Sanghavi et al., 2018). Indeed, in MDCK cells,  
384 microscopy analysis and mathematical modelling based on the laws of probability  
385 suggested that endosomes/lysosomes partitioning between daughter cells is stochastic  
386 (Bergeland et al, 2001). Others show that in telophasic cells, endosomal compartments are  
387 clustered at the cleavage furrow, suggesting that microtubules are involved in this process.  
388 However, no mechanism ensuring endosomal compartment anchorage to either spindle has  
389 been revealed, suggesting that this repartition is stochastic. Similarly, in Dictyostelium  
390 cells, it has been demonstrated that dynein and kinesin motors drive phagosomes  
391 segregation independently of each other and stochastically (Shanghavi et al 2018). To our  
392 knowledge, our present study is the first to relate a mechanism of a random segregation of  
393 organelles to functional heterogeneity of immune cells.

394

395 What could be the functional role of asymmetric molecular segregation during mitosis in  
396 human CD8<sup>+</sup> T cells? We propose that a mechanism of asymmetric distribution in  
397 telophase (that is stationary at each division, but not inherited by daughter cells) can be  
398 instrumental to randomly generate short-lived CTL cohorts harboring functional  
399 heterogeneity while ensuring globally reproducible antigen specific CD8<sup>+</sup> T cell responses.  
400 This process might confer robustness to CTL responses through population averaging  
401 (Buchholz et al., 2016; Hodgkin et al., 2014).

402

403 It is interesting to note that our results present analogies with previously published data in  
404 which asymmetric segregation of internalized exogenous antigen was found to occur  
405 during B cell division (Thaunat et al., 2012). Together with this previous study, our results  
406 reveal an intriguing capacity of both T and B cells to stochastically distribute in telophase  
407 their acidic compartments: MHC Class II compartments for B cells and lytic granules for  
408 CD8<sup>+</sup> T cells. Thus, stochastic distribution in telophase appears to be a major mechanism  
409 ensuring a high variability of both humoral and cellular adaptive immune responses during  
410 lymphocyte clonal expansion.

411

412

413

414

415

416

417

418

419

420

421

422

423

424

425

426 **Material and Methods**

427

428 **Key resources table**

| <b>REAGENT or RESOURCE</b>                                           | <b>SOURCE</b>                             | <b>IDENTIFIER</b>            |
|----------------------------------------------------------------------|-------------------------------------------|------------------------------|
| <b>Antibodies</b>                                                    |                                           |                              |
| CD3 (human) mAb (TR66)                                               | Enzo                                      | cat# ALX-804-822             |
| Anti-CD28 (clone CD28.2)                                             | eBioscience                               | cat# 16-0289-81              |
| Recombinant ICAM-1-Fc fusion protein                                 | R&D Systems                               | cat# 720-IC                  |
| Monoclonal Anti-human CD107a (H4A3)                                  | BD Pharmingen                             | cat# 555798                  |
| Monoclonal Anti-human Perforin ( $\delta$ G9)                        | BD Pharmingen                             | cat# 556434                  |
| Monoclonal anti-human Granzyme B (GB11)                              | BD Pharmingen                             | cat# MAI-80734               |
| Rabbit polyclonal anti-human T-bet (Tbx21)                           | Abcam                                     | cat# ab181400                |
| Monoclonal anti-human C-myc (clone 9E10)                             | Thermo Scientific                         | cat# MA1-980                 |
| Rabbit polyclonal anti-human $\alpha$ -tubulin                       | Abcam                                     | cat# ab15246                 |
| Goat anti-mouse IgG1 Alexa Fluor 647                                 | Invitrogen                                | cat# A21240                  |
| Goat anti-rabbit (H+L) AlexaFluor <sup>®</sup> 488                   | Invitrogen                                | cat# A11034                  |
| Donkey anti-rabbit (H+L) AlexaFluor <sup>®</sup> 647                 | Invitrogen                                | cat# A31573                  |
| goat anti-rabbit AlexaFluor <sup>®</sup> 555                         | Invitrogen                                | cat# A21428                  |
| Goat anti-mouse IgG Abberior Star 580                                | Abberior Instruments                      | cat# 52403                   |
| <b>Biological Samples</b>                                            |                                           |                              |
| Buffy coats of Healthy donors with consent and approval AC-2014-2384 | EFS, Toulouse, France                     |                              |
| <b>Chemicals, Peptides, and Recombinant Proteins</b>                 |                                           |                              |
| CMV peptide p65 (NV-9)                                               | GeneCust                                  | cat# 181329                  |
| Human rIL-2                                                          | Miltenyi Biotec                           | cat# 130-097-748             |
| Human rIL-15                                                         | Miltenyi Biotec                           | cat# 130-095-766             |
| SYTOX <sup>™</sup> Orange Dead Cell Stain                            | Thermo Fisher Scientific                  | cat# S11368                  |
| DAPI                                                                 | Molecular Probes, Invitrogen <sup>™</sup> | cat# D1306<br>CAS 28718-90-3 |
| Hoechst 33342                                                        | ThermoFisher Scientific                   | Cat# 1399                    |
| <b>Critical Commercial Assays</b>                                    |                                           |                              |
| EasySep Negative human CD8+ T cell isolation kit                     | StemCell Technologies                     | cat# 17953                   |
| EasySep human Memory CD8+ T cell enrichment kit                      | StemCell Technologies                     | cat# 19159                   |
| CellTrace <sup>™</sup> Violet Cell Proliferation kit                 | ThermoFisher Scientific                   | cat# C34557                  |



|                                                                                                      |                                                                                  |                         |
|------------------------------------------------------------------------------------------------------|----------------------------------------------------------------------------------|-------------------------|
| mMessage mMACHINE™ T7 ULTRA transcription kit                                                        | Invitrogen™                                                                      | cat# AM1345             |
| LysoTraker Blue (DND22) Dye                                                                          | Molecular probes                                                                 | cat# L7525              |
| LysoTraker Red (DND99) Dye                                                                           | Molecular probes                                                                 | cat#L7528               |
| Cell Tracker Green CMFDA Dye                                                                         | ThermoFisher Scientific                                                          | cat# C7025              |
| 7-Aminoactinomycin D (7-AAD)                                                                         | BD Pharmingen™                                                                   | cat# 559925             |
| Ibidi μ-slide chambered coverslips Angiogenesis                                                      | Ibidi, Biovalley                                                                 | cat# 81506              |
| Ibidi μ-slide chambered coverslips 8 well                                                            | Ibidi, Biovalley                                                                 | cat# 80821              |
| Nunc Lab-Tek chamber slides 8 wells                                                                  | Nunc, ThermoFisher                                                               | cat#1 54526             |
| Micromesh array (100 μm)                                                                             | Microsurface, Tebu-Bio                                                           | cat# MMA-0500-100-08-01 |
| <b>Cell Lines</b>                                                                                    |                                                                                  |                         |
| HLA-A2 restricted CD8+ T cell clone (VLAELVKQI)                                                      |                                                                                  |                         |
| HLA-A2 restricted CD8+ T cell clone (NLVPMVATV)                                                      |                                                                                  |                         |
| JY (EBV-transformed B cells)                                                                         |                                                                                  |                         |
| <b>Oligonucleotides</b>                                                                              |                                                                                  |                         |
| Primer : XhoI-T7-GzB Forward<br>caaCTCGAGTAATACGACTCACTATAGGGAG<br>ACCCGGTACCatgcaaccaatcctgcttctgcc | This paper                                                                       | N/A                     |
| Primer: EcoRI-GzB-noSTOP-R<br>caaGAATTCggcggtggcggtttcatggtttctttatccag                              | This paper                                                                       | N/A                     |
| <b>Recombinant DNA</b>                                                                               |                                                                                  |                         |
| MGC Human GZMB Sequence verified cDNA (Clone Id: 5223876)                                            | GE Healthcare BIO Sciences                                                       | cat# MHS6278-202801737  |
| mCherry-SEpHluorin from Sergio Grinstein                                                             | <i>Koivusalo et al J Cell Biol. 2010 Feb 22;188(4):547-63. Epub 2010 Feb 15.</i> | Addgene cat# 32001      |
| pT7-GZMB-mCherry-SEpHluorin                                                                          | This paper                                                                       | N/A                     |
| <b>Software and Algorithms</b>                                                                       |                                                                                  |                         |
| IDEAS SpotCount Threshold (M03,nucleus,60)                                                           | Amnis, Luminex                                                                   |                         |
| IDEAS Area Range Threshold (M02,tubulin,75), 50-5000, 0-0.5                                          | Amnis, Luminex                                                                   |                         |

|                                                                                                                                                          |                                                                                                                                                                         |  |
|----------------------------------------------------------------------------------------------------------------------------------------------------------|-------------------------------------------------------------------------------------------------------------------------------------------------------------------------|--|
| Fiji                                                                                                                                                     | <i>Schindelin, J.; Arganda-Carreras, I. &amp; Frise, E. et al. (2012), "Fiji: an open-source platform for biological-image analysis", Nature methods 9(7): 676-682.</i> |  |
| Imaris Software                                                                                                                                          | Oxford Instruments                                                                                                                                                      |  |
| Paired Student's t-test was performed using GraphPad Prism software version 5 for windows.                                                               |                                                                                                                                                                         |  |
| $\chi^2$ of independence test, $\chi^2$ of homogeneity test and Kolmogorov-Smirnov goodness of fit test were performed using Python software version 3.5 |                                                                                                                                                                         |  |
| STED images were deconvolved with Huygens Professional version 18.10 using CMLE algorithm with SNR:7                                                     | Scientific Volume Imaging, USA                                                                                                                                          |  |
| ZEN ZEISS Efficient Navigation                                                                                                                           |                                                                                                                                                                         |  |
| FlowJo software                                                                                                                                          | TreeStar                                                                                                                                                                |  |
| <b>Other</b>                                                                                                                                             |                                                                                                                                                                         |  |
| ImageStream®X                                                                                                                                            | Amnis, Luminex                                                                                                                                                          |  |
| Zeiss 710 Confocal Microscope LSM710                                                                                                                     | Zeiss                                                                                                                                                                   |  |
| Zeiss 880 Confocal microscope LSM880                                                                                                                     | Zeiss                                                                                                                                                                   |  |
| BD FACSAria SORP                                                                                                                                         | BD Biosciences                                                                                                                                                          |  |
| BD LSRFortessa                                                                                                                                           | BD Biosciences                                                                                                                                                          |  |
| Spinning Disc                                                                                                                                            |                                                                                                                                                                         |  |

429

430 ***Experimental model and subject details***

431 Peripheral blood mononuclear cells were isolated from buffy coats of healthy donors  
 432 obtained through the Etablissement Français du Sang (EFS, Toulouse, France). Blood  
 433 samples were collected and processed following standard ethical procedures (Helsinki  
 434 protocol), after obtaining written informed consent from each donor and approval by the  
 435 French Ministry of the Research (transfer agreement AC-2014-2384). Approbation by the  
 436 ethical department of the French Ministry of the Research for the preparation and

437 conservation of cell lines and clones starting from healthy donor human blood samples has  
438 been obtained (authorization No DC-2018-3223).

439

#### 440 *Cell culture and stimulating conditions*

441 Total human CD8<sup>+</sup> T cells were purified from healthy donor blood samples using the  
442 EasySep Negative human CD8<sup>+</sup> T cell isolation kit (StemCell Technologies). CD8<sup>+</sup> T cells  
443 were routinely ~90% pure. Memory human CD8<sup>+</sup> T cells were purified from healthy donor  
444 blood samples using the EasySep Human Memory CD8<sup>+</sup> T cell enrichment kit (StemCell  
445 Technologies), cells were routinely ~90% CD8<sup>+</sup>RO<sup>+</sup>RA<sup>-</sup>.

446 HLA-A2 restricted CD8<sup>+</sup> T cell clones, specific for the NLVPMVATV peptide or the  
447 VLAELVKQI peptide of the CMV protein pp65 were cultured in complete RPMI/HS  
448 medium (RPMI 1640 medium supplemented with 5% human AB serum; Inst.  
449 Biotechnologies J. Boy, Reims), minimum essential amino acids, HEPES, sodium pyruvate  
450 (Invitrogen), 2-mercaptoethanol (5 μM, Gibco) and 150 IU/ml human rIL-2 and 50ng/ml  
451 rIL-15). Clones were re-stimulated every 2-3 weeks in 24-wells plate with 1×10<sup>6</sup> irradiated  
452 (35 Gy) allogeneic peripheral blood mononuclear cells (isolated on Ficoll Paque Gradient  
453 from fresh heparinized blood samples of healthy donors, obtained from EFS) and 1×10<sup>5</sup>  
454 irradiated EBV-transformed B cells. Complete RPMI/HS-Medium was supplemented with  
455 1 μg/ml PHA.

456 For imaging flow cytometry (ImageStream®X, Merk) and confocal laser-scanning  
457 microscopy human CD8<sup>+</sup> T cells or CD8<sup>+</sup> T cell clones were stimulated for 72h with  
458 immobilized anti-CD3 (1 μg/ml, TR66, (Valitutti, 1995)), anti-CD28 (1 μg/ml, clone  
459 CD28.2, eBioscience) and immobilized recombinant ICAM1-Fc fusion protein (0.5μg/ml,

460 R&D Systems) in complete RPMI/HS medium. For confocal laser-scanning, cells were  
461 plated on anti-CD3/CD28/ICAM1 coated Nunc Lab-Tek Chamber Slide™ system 8 wells  
462 at 500 000 cells / well. For image stream analysis, cells were plated on anti-  
463 CD3/CD28/ICAM1 coated 24 well plates at  $1.5 \times 10^6$  cells / well.

464

#### 465 *Image Stream analysis*

466 Staining and acquisition strategy. Cells were first stained with CellTrace™ Violet Cell  
467 Proliferation Kit (CTV) in PBS (5  $\mu$ M, 20 min, 37°C). After 72 hours of stimulation (cf:  
468 Cell culture and stimulating condition), cells were fixed in 1% PFA (10 min, 37°C) and  
469 permeabilized in permeabilization buffer (PBS 3% BSA, 0.1% saponin, Sigma) for 5 min.  
470 Cells were incubated for 45 min with the indicated antibodies: AlexaFluor® 647 anti-human  
471 CD107a antibody (diluted at 1/100, clone H4A3; BD Pharmingen™), anti-human Perforin  
472 (10 $\mu$ g/ml, clone  $\delta$ G9; BD Pharmingen™), AlexaFluor® 647 anti-human Granzyme B  
473 antibody (10 $\mu$ g/ml, clone GB11, BD Pharmingen™), anti-human T-bet (Tbx21) (10 $\mu$ g/ml,  
474 clone 4B10; Abcam), anti-human C-myc (10 $\mu$ g/ml, clone 9E10; Thermo scientific), anti-  
475 human  $\alpha$ -tubulin (diluted at 1/100, rabbit polyclonal; Abcam). The following secondary  
476 antibodies were used: AlexaFluor®488 or 647 goat anti-mouse IgG1 (10 $\mu$ g/ml; Invitrogen),  
477 AlexaFluor®488 or 647 anti-rabbit (H+L) (10 $\mu$ g/ml; Invitrogen). For image acquisition,  
478 cells were adjusted to  $10 \cdot 10^6$  -  $20 \cdot 10^6$  /mL in FACS buffer (PBS, 1% FCS, 5% Hepes, 0.1%  
479 Azide) containing SYTOX™ Orange Dead Cell Stain (recommended dilution, Thermo  
480 Fisher Scientific) for nuclear staining. Cells were acquired using ImageStream®X (IsX;  
481 Amnis, Luminex) technology.

482 Telophase discrimination strategy. Amnis IDEAS software was used to analyze IsX data  
483 and identify cells in telophase. As in classical cytometry data analysis, cells in G2/M phase

484 were first selected according to their DNA content (fluorescence of SYTOX orange). A  
485 mask based on nuclear staining was employed (SpotCount Threshold (M03, nucleus, 60))  
486 to visualize the nuclei of cells/events in the G2/M fraction at the single cell level. A second  
487 mask (Area Range (Threshold (M02, tubulin, 75), 50-5000, 0-0.5)) based on the  $\alpha$ -tubulin  
488 staining (to clearly identify the narrow intracellular bridge of highly condensed  $\alpha$ -tubulin  
489 that participates to midbody formation) was employed to distinguish telophases from  
490 anaphases or cell-doublets. Finally, the results from both masks were used to manually  
491 verify that selected cells were cells unambiguously in telophase.

492 *Analysis of cell protein distribution during telophase using Fiji.* Staining intensities of  $\alpha$ -  
493 tubulin, CTV and of the different markers of interest were analyzed on Fiji to determine  
494 the percentage of proteins inherited by the two nascent daughter cells in telophase.

495 Watershed function of Fiji software was used on the  $\alpha$ -tubulin staining intensity to  
496 determine the specific areas corresponding to the two nascent daughter cells in telophase.

497 The obtained areas were converted to masks that were next applied to measure CTV and  
498 the fluorescence of the different markers of interest. This procedure allowed us to  
499 determine the intensity of fluorescence in the two nascent daughter cells in telophase  
500 respectively. The percentage of staining in each nascent daughter cell was determined as:

501 
$$\text{Fluorescence Intensity of daughter cell 1} / (\text{Fluorescence Intensity of daughter cell 1} +$$
  
502 
$$\text{Fluorescence Intensity of daughter cell 2}) \times 100.$$
 To test the specificity of the staining with  
503 the different antibodies used to study molecular repartition in telophase, we measured the  
504 fluorescent intensity of secondary antibodies or isotype controls as compared to specific  
505 antibodies. This analysis gave the following values of MFI: CD107a 70.527 isotype control  
506 13.621; perforin 716.312, secondary mouse antibody 56.383; GrzB 677.445 isotype control

507 13.621; T-Bet 356.228 secondary mouse antibody 56.383; c-Myc 1.434.537 secondary  
508 rabbit antibody 14.231.

509

### 510 *3D laser scanning microscopy on fixed cells*

511 After 72 hours of stimulation, cells were fixed in 1% PFA (10 min, 37°C). Permeabilization  
512 and staining with antibodies were performed in PBS 3% BSA, 0.1% saponin (Sigma) for  
513 5 min and 45 min respectively. The following antibodies were used: anti-human CD107a  
514 (10µg/ml, cloneH4A3, BD Pharmingen™) followed by AlexaFluor®488 goat anti-mouse  
515 IgG1 (10µg/ml; Invitrogen), anti-human α-tubulin (diluted at 1/100, rabbit polyclonal;  
516 Abcam) followed by AlexaFluor®555 goat anti-rabbit (10µg/ml; Invitrogen). Nuclei were  
517 labeled with DAPI (1µg/ml, 5 min). The samples were mounted in 90% glycerol-PBS  
518 containing 2.5% DABCO (Sigma) and examined using a LSM710 (Zeiss) confocal  
519 microscope with a ×63 plan-Apochromat objective (1.4 oil) with an electronic zoom of 4.  
520 Cells in telophase were identified on the basis of nuclear and tubulin marker staining. 3D  
521 images (using the z-stack function) were acquired for every cell identified as being in  
522 telophase. CD107a fluorescence intensity in the two nascent daughter cells was measured  
523 on 2-D image projections obtained applying the Sum function of Fiji Software to z-stack  
524 series. Since the background noise made the watershed function unsuitable to use, a region  
525 of interest (ROI) corresponding to the nascent daughter cell was manually drawn on the  
526 basis of brightfield and tubulin staining. We determined the percentage of CD107a staining  
527 in each nascent daughter cell as:  $\text{CD107a intensity of daughter cell 1} / (\text{CD107a intensity}$   
528  $\text{of daughter cell 1} + \text{CD107a intensity of daughter cell 1}) \times 100$ .

529

530 ***Stimulated Emission Depletion Microscopy***

531 CTL were seeded on poly-L-lysine coated high performance coverslips and fixed in 3%  
532 PFA (10 min, 37°C). Permeabilization and staining were performed in PBS 3% BSA, 0.1%  
533 saponin (Sigma) for 5 min and 60 min respectively. Cells were stained with an anti-human  
534 Granzyme B antibody (10µg/ml, clone GB11, BD Pharmingen TM) followed by a goat  
535 anti-mouse IgG Abberior Star 580 (Abberior Instruments). Coverslips (high performance  
536 D=0.17mm +/-0.005, ZEISS, Germany) were mounted on microscopy slides using  
537 Mowiol-DABCO.

538 STED images were acquired with a Leica SP8 STED 3X microscope (Leica Microsystems,  
539 Germany) using a HC PL APO CS2 100X/1.4 oil immersion objective. To optimize  
540 resolution without bleaching in 3-D, the 775 nm STED lasers line was applied at the lowest  
541 power that can provide sufficient improvement in resolution compared to confocal. Z-stack  
542 series were acquired sequentially with the pulsed 532 nm laser. For image acquisition, we  
543 used the following parameters: 3 time average/line, 400 Hz scan speed. STED images were  
544 subsequently deconvoluted with Huygens Professional (SVI, USA) using the CMLE  
545 algorithm, with a signal to noise ratio (SNR) of 7. 3-D image visualization was performed  
546 using the Fiji software.

547

548 ***Live cell imaging***

549 For 3D live cell imaging, the T7 GZMB sequence was obtained by PCR amplification as a  
550 XhoI-EcoRI fragment from pCMV-SPORT6-GZMB by using XhoI-T7-GZB forward  
551 primer and EcoRI-GRZB noSTOP reverse primer (Employed primers: Name: XhoI-T7-  
552 GzB F

553 caaCTCGAGTAATACGACTCACTATAGGGAGACCCGGTACCatgcaaccaatcctgcttctgcc

554 Name: EcoRI-GzB-noSTOP-R caaGAATTCcggcgtggcggtttcatggttttctttatccag).

555 XhoI-EcoRI fragment was cloned as a mCherry-SEpHlurin fusion construct in the  
556 pmCherry-SEpHlurin vector to produce the vector pGZMB-mCherry-SEpHlurin  
557 available to *in vitro* T7 transcription. The plasmid pCMV-SPORT6-GZMB and pmCherry-  
558 SEpHlurin were purchased from Addgene.

559 For efficient transfection of human CTL with tagged molecules allowing to monitor lytic  
560 granule repartition during mitosis, we synthesized capped and tailed poly(A) mCherry-  
561 tagged Granzyme B mRNA by *in vitro* transcription from the plasmid pGZMB-mCherry-  
562 SEpHlurin. One microgramme of pGZMB-mCherry-SEpHlurin was first linearized by  
563 NotI digestion to be used as templates for *in vitro* transcription by the T7 RNA polymerase  
564 using mMMESSAGE mMACHINE T7 Ultra kit as per manufacturer's protocol.

565 Human CTL were transfected using a GenePulser Xcell electroporation system (BioRad).  
566  $1 \times 10^6$  CTL (5days after restimulation therefore in expansion phase) were washed and  
567 resuspended in 100 $\mu$ l Opti-MEM medium (Gibco) at RT with 2 $\mu$ g mCherry-tagged  
568 Granzyme B mRNA (*square wave* electrical pulse at 300V, 2ms, 1 pulse). 18 hours after  
569 transfection the transfection efficacy was verified by FACS analysis (typically 50-80%).  
570 Transfected CTL were seeded into poly-D-lysine-coated eight-well chambered slides  
571 (Ibidi, Munich, Germany) before imaging. Chambered slides were mounted on a heated  
572 stage within a temperature-controlled chamber maintained at 37°C and constant CO<sub>2</sub>  
573 concentrations (5%) and inspected by time-lapse laser scanning confocal microscopy  
574 (LSM880, Zeiss, Germany with 1 image /30 seconds) for additional 5-6 hours using a Tile



575 Scan mode to enlarge the acquisition fields and capture the rare cells undergoing  
576 spontaneous division during the time of acquisition.

577

578 For 4D live cell imaging, 72 hours after stimulation, CD8<sup>+</sup> T cells were stained with  
579 Hoechst (200 ng/ml, ThermoFisher Scientific) to sort cells in G2/M phase by flow-  
580 cytometry (BD FACSAria SORP, BD Biosciences). Sorted cells were stained with  
581 LysoTracker Red (200 nM ThermoFisher) for 30 min at 37°C and washed. 20 000 cells in  
582 5% HS/IL2/IL15 complete RPMI medium supplemented with 10 mM HEPES were seeded  
583 into poly-D-lysine-coated eight-well chambered slides (Ibidi, Munich, Germany) pre-  
584 coated with PDMS micromesh\_arrays (Microsurfaces, Melburn, Australia) containing 100-  
585 µm-diameter wells. Cells were 4D imaged (time and z-stack) on a heated stage within a  
586 temperature-controlled chamber maintained at 37°C and constant CO<sub>2</sub> concentrations (5%)  
587 and inspected over night by time-lapse laser scanning confocal microscopy with a Plan-  
588 Apochromat 40x/1.3 Oil DIC M27 using an LSM780 or LSM880, Zeiss, Germany) or by  
589 spinning disk time-lapse microscopy using a spinning-disk microscope (Nikon) running on  
590 Metamorph software. A camera emCCD Evolve (Photometrics) was used for acquisitions.  
591 Image analysis was performed using Fiji software and 4-D movies and snapshots were  
592 generated with Imaris software.

593

#### 594 *Cytotoxicity assay*

595 CTL were incubated with 200nM LysoTracker Blue<sup>®</sup> a probe staining the acidic lytic  
596 compartment of these cells (Faroudi et al., 2003) for 30 minutes at 37°C/5% CO<sub>2</sub> in 5%  
597 FCS/RPMI/HEPES. After washing, cells expressing the highest and lowest 5-10 %

598 LysoTracker Blue staining were sorted using a FACSARIA-SORP (BD Biosciences). CTL  
599 were used for standard over-night killing assays on the day of cell. Target cells were left  
600 unpulsed or pulsed with 10 $\mu$ M antigenic peptide during 2 hours at 37°C/5% CO<sub>2</sub>, washed  
601 three times and subsequently transferred to a 96 well U-bottom plate at 10 $\times$ 10<sup>3</sup> cells/100 $\mu$ l  
602 RPMI, 5% FCS/HEPES. CTL were added to the target cells at the indicated effector (CTL):  
603 target (JY) ratio, in 100 $\mu$ l RPMI, 5% FCS/HEPES. Cells were pelleted for 1 min at 455 g  
604 and incubated at 37°C/5% CO<sub>2</sub> overnight. Before FACS analysis, 0.25 $\mu$ g 7-  
605 Aminoactinomycin D (7-AAD; BD Biosciences) and FITC conjugated anti-CD8 antibody  
606 were added to each sample in order to measure the percentage of dead target cells.

607

#### 608 ***Statistical methods***

609 *Paired Student's t-test*, was performed to determine the statistical significance of  
610 differences between the groups (GraphPad Prism software version 5).

611 *Chi-square of independence test* was performed to determine the independence between  
612 the level of expression of a given marker and the capacity of a cell in telophase to  
613 asymmetrically distribute this marker (Python software version 3.5).

614 *Kolmogorov-Smirnov goodness of fit test* was performed to compare law between  
615 probability distribution of a marker of interest in cells in G1 (Python software version 3.5).

616 *Chi-square of homogeneity test* was performed (in addition Kolmogorov-Smirnov  
617 goodness of fit test) to determine where the probability distribution of a marker of interest  
618 varies (Python software version 3.5).

619

#### 620 ***Statistical procedures***

| <b>Independence Chi2 test between heterogeneous cells and all cells</b> | Test statistic ( $\chi^2$ ) | $\chi^2_{1-\alpha,dl}$ | p-value (p) | Degree of freedom (dl) |
|-------------------------------------------------------------------------|-----------------------------|------------------------|-------------|------------------------|
| CD107a, Experiment 1, 0 division                                        | 4,060439                    | 11,07                  | 0,540748    | 5                      |
| CD107a, Experiment 1, 1 division                                        | 3,565087                    | 11,07                  | 0,613563    | 5                      |
| CD107a, Experiment 1, 2 divisions                                       | 1,614763                    | 7,815                  | 0,656047    | 3                      |
| CD107a, Experiment 2, 0 division                                        |                             |                        |             |                        |
| CD107a, Experiment 2, 1 division                                        | 0,278928                    | 7,815                  | 0,963942    | 3                      |
| CD107a, Experiment 2, 2 divisions                                       | 0,413804                    | 7,815                  | 0,937376    | 3                      |
| CD107a, Experiment 3, 0 division                                        | 2,36867                     | 15,51                  | 0,967574    | 8                      |
| CD107a, Experiment 3, 1 division                                        | 2,092976                    | 9,488                  | 0,718663    | 4                      |
| CD107a, Experiment 3, 2 divisions                                       | 0,655225                    | 9,488                  | 0,956734    | 4                      |

621

622 Table 1: Results of independence Chi-square test in telophase

623 In the independence Chi-square test, we compare the theoretical effective ( $e_{i,j}$ ) to the  
 624 observed effective ( $n_{i,j}$ ). The test statistic is defined by:

625 
$$\chi^2 = \sum_{i,j} \frac{(n_{i,j} - e_{i,j})^2}{e_{i,j}}$$

626 We compare it to  $\chi^2_{1-\alpha,dl}$ , the quantile of the  $\chi^2$  distribution associated to the  $1 - \alpha$   
 627 quantile. The quantile with  $1 - \alpha = 95\%$  is the value such that  $P(X < \chi^2_{0.95,dl}) = 95\%$   
 628 where P stands for the probability distribution of the Chi-square statistics with the  
 629 associated degree of freedom dl.

630 We reject the hypothesis of independence between division of heterogeneous cells and  
 631 division of all cells in one experiment when  $\chi^2 \geq \chi^2_{1-\alpha,dl}$  or when the p-value p satisfies  
 632  $p < \alpha = 5\%$ .

633 The red boxes represent the situations where we do not reject the hypothesis of  
 634 independence of division between heterogeneous cells and all cells in one experiment. We  
 635 shall observe that we never reject the hypothesis of independence.

| Kolmogorov-Smirnov test<br><u>Experiment 1</u> |  | 0 division |         | 1 division |         | 2 division |         |
|------------------------------------------------|--|------------|---------|------------|---------|------------|---------|
|                                                |  | $D_{n,m}$  | p-value | $D_{n,m}$  | p-value | $D_{n,m}$  | p-value |
| 0 division                                     |  |            |         |            |         |            |         |
| 1 division                                     |  | 0,13148    | 0       |            |         |            |         |
| 2 division                                     |  | 0,220034   | 0       | 0,116283   | 0       |            |         |

  

| Kolmogorov-Smirnov test<br><u>Experiment 2</u> |  | 0 division |         | 1 division |          | 2 division |          |
|------------------------------------------------|--|------------|---------|------------|----------|------------|----------|
|                                                |  | $D_{n,m}$  | p-value | $D_{n,m}$  | p-value  | $D_{n,m}$  | p-value  |
| 0 division                                     |  |            |         |            |          |            |          |
| 1 division                                     |  | 0,087873   | 0       |            |          |            |          |
| 2 division                                     |  | 0,0891924  | 0       | 0,04634    | 0,03582  |            |          |
| 3 division                                     |  | 0,054621   | 0,0159  | 0,067702   | 0,001185 | 0,047275   | 0,116534 |

  

| Kolmogorov-Smirnov test<br><u>Experiment 3</u> |  | 0 division |          | 1 division |         | 2 division |         |
|------------------------------------------------|--|------------|----------|------------|---------|------------|---------|
|                                                |  | $D_{n,m}$  | p-value  | $D_{n,m}$  | p-value | $D_{n,m}$  | p-value |
| 0 division                                     |  |            |          |            |         |            |         |
| 1 division                                     |  | 0,148714   | 0,002607 |            |         |            |         |
| 2 division                                     |  | 0,209553   | 0        | 0,143594   | 0       |            |         |
| 3 division                                     |  | 0,190642   | 0        | 0,121757   | 0       | 0,038549   | 0,3545  |

636

637 Table 2: Results of Kolmogorov-Smirnov test on G1

638 The Kolmogorov-Smirnov test consists in analyzing if two independent samples follow the  
 639 same law comparing their cumulative distribution function. We denote the two samples  
 640  $X_1, X_2, \dots, X_n$  and  $Y_1, Y_2, \dots, Y_m$ . If we denote by  $F_n$  and  $F_m$  their cumulative distribution  
 641 respectively, the test statistic is defined by:

642 
$$D_{n,m} = \sup_{x \in R} |F_n(x) - F_m(x)|$$

643

644 We compare it to  $d_{n,m,1-\alpha}$ , the quantile of the associated Kolmogorov-Smirnov  
 645 distribution.

646 We then reject the hypothesis of adequation between cells of one division and cells of one  
 647 other division in one experiment when  $D_{n,m} \geq d_{n,m,1-\alpha}$  or when the p-value p satisfies  
 648  $p < \alpha = 5\%$ .

649 The red boxes represent the situation where we do not reject the hypothesis of adequation  
650 between cells in one division and cells in another division. The white box represents the  
651 situation where we reject this hypothesis.

652

### 653 **Probability of an asymmetric repartition of lytic granules**

654 To obtain a tractable formula for the computation of the probability of an asymmetric  
655 repartition of lytic granules, we use a binomial model that translates that each granule  
656 possesses a probability of 0.5 to attain each of the two daughter cells. The binomial model  
657 also assumes that all the granules behave independently of each other.

658 In that case, the probability of an asymmetric division for  $n$  granules is then equal to

$$659 \quad p_n = 2^{-n} \sum_{k < 0.4n} \frac{n!}{k!(n-k)!} + 2^{-n} \sum_{k > 0.6n} \frac{n!}{k!(n-k)!}$$

660

661

662

### 663 **Acknowledgements**

664 We thank Dr. Stephane Manenti for discussion and critical reading of the manuscript ; Dr.  
665 Hellen Robey and Dr. Pauline Gonnord for discussion. We thank Dr. Liza Filali for advice  
666 in image analysis and Dr. Juliet Foote for critical reading of the manuscript. We thank the  
667 flow cytometry and imaging core facilities of the INSERM UMR 1043, CPTP and of the  
668 INSERM UMR 1037, CRCT, Toulouse, France.

669

670 This work was supported by grants from the Laboratoire d'Excellence Toulouse Cancer  
671 (TOUCAN) (contract ANR11-LABEX), Region Occitanie (contracts RCLE R14007BB,

672 No 12052802, and RBIO R15070BB, No 14054342), Fondation Toulouse Cancer Santé  
673 (contract 2014CS044) and from the Ligue Nationale contre le Cancer (Equipe labellisée  
674 2018).

675 R.J. was supported by the Laboratoire d'Excellence Toulouse Cancer (TOUCAN) (contract  
676 ANR11-LABEX) and by the Ligue Nationale contre le Cancer.

677 The funders had no role in study design, data collection and analysis, decision to publish,  
678 or preparation of the manuscript.

679

#### 680 **Author Contributions**

681 F.L and R.J designed the research, performed experiments, analyzed and discussed results  
682 and wrote the paper ; S.M. provided cellular tools, performed experiments, discussed  
683 results and wrote the paper ; M.D. performed statistical analysis of the experimental data;  
684 M.P.P. provided molecular tools ; S.G. performed statistical analysis of the experimental  
685 data and wrote the paper ; V.D. provided technical tools and advices ; E.E. discussed results  
686 ; S.V. designed and supervised the research and wrote the paper.

687

#### 688 **Competing Interests statement**

689 The authors declare no competing financial interests.

690

691

692

693

694

## 695 References

- 696 Arsenio J, Kakaradov B, Metz PJ, Kim SH, Yeo GW, Chang JT. 2014. Early specification of  
697 CD8+ T lymphocyte fates during adaptive immunity revealed by single-cell gene-  
698 expression analyses. *Nat Immunol* **15**:365–372. doi:10.1038/ni.2842
- 699 Arsenio J, Metz PJ, Chang JT. 2015. Asymmetric Cell Division in T Lymphocyte Fate  
700 Diversification. *Trends Immunol* **36**:670–683. doi:10.1016/j.it.2015.09.004
- 701 Basiji D, O’Gorman MR. 2015. Imaging flow cytometry. *J Immunol Methods* **423**:1–2.  
702 doi:10.1016/j.jim.2015.07.002
- 703 Bergeland T, Widerberg J, Bakke O, Nordeng TW. 2001. Mitotic partitioning of endosomes and  
704 lysosomes. *Current Biology* **11**:644–651. doi:10.1016/S0960-9822(01)00177-4
- 705 Beuneu H, Lemaitre F, Deguine J, Moreau HD, Bouvier I, Garcia Z, Albert ML, Bousso P. 2010.  
706 Visualizing the functional diversification of CD8+ T cell responses in lymph nodes.  
707 *Immunity* **33**:412–23. doi:10.1016/j.immuni.2010.08.016
- 708 Buchholz VR, Flossdorf M, Hensel I, Kretschmer L, Weissbrich B, Graf P, Verschoor A,  
709 Schiemann M, Hofer T, Busch DH. 2013. Disparate individual fates compose robust  
710 CD8+ T cell immunity. *Science* **340**:630–5. doi:10.1126/science.1235454
- 711 Buchholz VR, Schumacher TN, Busch DH. 2016. T Cell Fate at the Single-Cell Level. *Annu Rev*  
712 *Immunol* **34**:65–92. doi:10.1146/annurev-immunol-032414-112014
- 713 Carlton JG, Jones H, Eggert US. 2020. Membrane and organelle dynamics during cell division.  
714 *Nat Rev Mol Cell Biol* **21**:151–166. doi:10.1038/s41580-019-0208-1
- 715 Chang JT, Ciocca ML, Kinjyo I, Palanivel VR, McClurkin CE, Dejong CS, Mooney EC, Kim JS,  
716 Steinel NC, Oliaro J, Yin CC, Florea BI, Overkleeft HS, Berg LJ, Russell SM, Koretzky  
717 GA, Jordan MS, Reiner SL. 2011. Asymmetric proteasome segregation as a mechanism  
718 for unequal partitioning of the transcription factor T-bet during T lymphocyte division.  
719 *Immunity* **34**:492–504. doi:10.1016/j.immuni.2011.03.017
- 720 Chang JT, Palanivel VR, Kinjyo I, Schambach F, Intlekofer AM, Banerjee A, Longworth SA,  
721 Vinup KE, Mrass P, Oliaro J, Killeen N, Orange JS, Russell SM, Weninger W, Reiner  
722 SL. 2007. Asymmetric T lymphocyte division in the initiation of adaptive immune  
723 responses. *Science* **315**:1687–91. doi:10.1126/science.1139393
- 724 Cobbold SP, Adams E, Howie D, Waldmann H. 2018. CD4+ T Cell Fate Decisions Are  
725 Stochastic, Precede Cell Division, Depend on GITR Co-Stimulation, and Are Associated  
726 With Uropodium Development. *Front Immunol* **9**:1381. doi:10.3389/fimmu.2018.01381
- 727 Dewey EB, Taylor DT, Johnston CA. 2015. Cell Fate Decision Making through Oriented Cell  
728 Division. *J Dev Biol* **3**:129–157. doi:10.3390/jdb3040129
- 729 Doan M, Vorobjev I, Rees P, Filby A, Wolkenhauer O, Goldfeld AE, Lieberman J, Barteneva N,  
730 Carpenter AE, Hennig H. 2018. Diagnostic Potential of Imaging Flow Cytometry. *Trends*  
731 *in Biotechnology* **36**:649–652. doi:10.1016/j.tibtech.2017.12.008
- 732 Faroudi M, Utzny C, Salio M, Cerundolo V, Guiraud M, Muller S, Valitutti S. 2003. Lytic versus  
733 stimulatory synapse in cytotoxic T lymphocyte/target cell interaction: Manifestation of a  
734 dual activation threshold. *Proceedings of the National Academy of Sciences of the United*  
735 *States of America* **100**:14145–14150. doi:10.1073/pnas.2334336100
- 736 Filby A, Perucha E, Summers H, Rees P, Chana P, Heck S, Lord GM, Davies D. 2011. An  
737 imaging flow cytometric method for measuring cell division history and molecular  
738 symmetry during mitosis. *Cytometry Part A* **79A**:496–506. doi:10.1002/cyto.a.21091
- 739 Ganesan AP, Clarke J, Wood O, Garrido-Martin EM, Chee SJ, Mellows T, Samaniego-Castruita  
740 D, Singh D, Seumois G, Alzetani A, Woo E, Friedmann PS, King EV, Thomas GJ,  
741 Sanchez-Elsner T, Vijayanand P, Ottensmeier CH. 2017. Tissue-resident memory  
742 features are linked to the magnitude of cytotoxic T cell responses in human lung cancer.  
743 *Nature Immunology* **18**:940–950. doi:10.1038/ni.3775



- 744 Gerlach C, Rohr JC, Perie L, van Rooij N, van Heijst JW, Velds A, Urbanus J, Naik SH, Jacobs  
745 H, Beltman JB, de Boer RJ, Schumacher TN. 2013. Heterogeneous differentiation  
746 patterns of individual CD8<sup>+</sup> T cells. *Science* **340**:635–9. doi:10.1126/science.1235487  
747 Girel S, Crauste F. 2019. Model-Based Assessment of the Role of Uneven Partitioning of  
748 Molecular Content on Heterogeneity and Regulation of Differentiation in CD8 T-Cell  
749 Immune Responses. *Frontiers in Immunology* **10**:16.  
750 Guldevall K, Brandt L, Forslund E, Olofsson K, Frisk TW, Olofsson PE, Gustafsson K,  
751 Manneberg O, Vanherberghen B, Brismar H, Karre K, Uhlin M, Onfelt B. 2016.  
752 Microchip Screening Platform for Single Cell Assessment of NK Cell Cytotoxicity. *Front*  
753 *Immunol* **7**:119. doi:10.3389/fimmu.2016.00119  
754 Halle S, Keyser KA, Stahl FR, Busche A, Marquardt A, Zheng X, Galla M, Heissmeyer V, Heller  
755 K, Boelter J, Wagner K, Bischoff Y, Martens R, Braun A, Werth K, Uvarovskii A,  
756 Kempf H, Meyer-Hermann M, Arens R, Kremer M, Sutter G, Messerle M, Forster R.  
757 2016. In Vivo Killing Capacity of Cytotoxic T Cells Is Limited and Involves Dynamic  
758 Interactions and T Cell Cooperativity. *Immunity* **44**:233–45.  
759 doi:10.1016/j.immuni.2016.01.010  
760 Hodgkin PD, Dowling MR, Duffy KR. 2014. Why the immune system takes its chances with  
761 randomness. *Nat Rev Immunol* **14**:711. doi:10.1038/nri3734-c1  
762 Hritzo MK, Courneya J-P, Golding A. 2018. Imaging flow cytometry: A method for examining  
763 dynamic native FOXO1 localization in human lymphocytes. *Journal of Immunological*  
764 *Methods* **454**:59–70. doi:10.1016/j.jim.2018.01.001  
765 Kaminski MM, Liedmann S, Milasta S, Green DR. 2016. Polarization and asymmetry in T cell  
766 metabolism. *Semin Immunol* **28**:525–534. doi:10.1016/j.smim.2016.10.002  
767 Knoblich JA. 2008. Mechanisms of asymmetric stem cell division. *Cell* **132**:583–97.  
768 doi:10.1016/j.cell.2008.02.007  
769 Kumar BV, Kratchmarov R, Miron M, Carpenter DJ, Senda T, Lerner H, Friedman A, Reiner SL,  
770 Farber DL. 2018. Functional heterogeneity of human tissue-resident memory T cells  
771 based on dye efflux capacities. *JCI Insight* **3**:e123568. doi:10.1172/jci.insight.123568  
772 Lemaitre F, Moreau HD, Vedele L, Bousso P. 2013. Phenotypic CD8<sup>+</sup> T cell diversification  
773 occurs before, during, and after the first T cell division. *J Immunol* **191**:1578–85.  
774 doi:10.4049/jimmunol.1300424  
775 Newell EW, Sigal N, Bendall SC, Nolan GP, Davis MM. 2012. Cytometry by time-of-flight  
776 shows combinatorial cytokine expression and virus-specific cell niches within a  
777 continuum of CD8<sup>+</sup> T cell phenotypes. *Immunity* **36**:142–52.  
778 doi:10.1016/j.immuni.2012.01.002  
779 Pham K, Sacirbegovic F, Russell SM. 2014. Polarized cells, polarized views: asymmetric cell  
780 division in hematopoietic cells. *Front Immunol* **5**:26. doi:10.3389/fimmu.2014.00026  
781 Pollizzi KN, Sun I-H, Patel CH, Lo Y-C, Oh M-H, Waickman AT, Tam AJ, Blosser RL, Wen J,  
782 Delgoffe GM, Powell JD. 2016. Asymmetric inheritance of mTORC1 kinase activity  
783 during division dictates CD8<sup>+</sup> T cell differentiation. *Nat Immunol* **17**:704–711.  
784 doi:10.1038/ni.3438  
785 Quah BJ, Parish CR. 2012. New and improved methods for measuring lymphocyte proliferation  
786 in vitro and in vivo using CFSE-like fluorescent dyes. *J Immunol Methods* **379**:1–14.  
787 doi:10.1016/j.jim.2012.02.012  
788 Rohr JC, Gerlach C, Kok L, Schumacher TN. 2014. Single cell behavior in T cell differentiation.  
789 *Trends Immunol* **35**:170–7. doi:10.1016/j.it.2014.02.006  
790 Sanghavi P, D'Souza A, Rai Ashim, Rai Arpan, Padinhatheeri R, Mallik R. 2018. Coin Tossing  
791 Explains the Activity of Opposing Microtubule Motors on Phagosomes. *Current Biology*  
792 **28**:1460-1466.e4. doi:10.1016/j.cub.2018.03.041  
793 Schumacher TN, Gerlach C, van Heijst JW. 2010. Mapping the life histories of T cells. *Nat Rev*  
794 *Immunol* **10**:621–31. doi:10.1038/nri2822



- 795 Thauinat O, Granja AG, Barral P, Filby A, Montaner B, Collinson L, Martinez-Martin N,  
796 Harwood NE, Bruckbauer A, Batista FD. 2012. Asymmetric segregation of polarized  
797 antigen on B cell division shapes presentation capacity. *Science* **335**:475–9.  
798 doi:10.1126/science.1214100
- 799 Valitutti S. 1995. Sustained signaling leading to T cell activation results from prolonged T cell  
800 receptor occupancy. Role of T cell actin cytoskeleton. *Journal of Experimental Medicine*  
801 **181**:577–584. doi:10.1084/jem.181.2.577
- 802 Vasconcelos Z, Muller S, Guipouy D, Yu W, Christophe C, Gadat S, Valitutti S, Dupre L. 2015.  
803 Individual Human Cytotoxic T Lymphocytes Exhibit Intraclonal Heterogeneity during  
804 Sustained Killing. *Cell Rep* **11**:1474–85. doi:10.1016/j.celrep.2015.05.002
- 805 Verbist KC, Guy CS, Milasta S, Liedmann S, Kaminski MM, Wang R, Green DR. 2016.  
806 Metabolic maintenance of cell asymmetry following division in activated T lymphocytes.  
807 *Nature* **532**:389–93. doi:10.1038/nature17442  
808

809 **Figure Legends**

810 **Figure 1: Lytic components are asymmetrically distributed in dividing CD8<sup>+</sup> T cells.**

811 (A-C) Freshly isolated polyclonal CD8<sup>+</sup> T cells or (D) CTL clones were stimulated by  
812 immobilized anti-CD8/anti-CD28/ICAM-1 during 72h and stained with antibodies directed  
813 against the indicated markers. Cells in telophase were identified using Imaging Flow  
814 Cytometry (A) Left panel: Each dot represents one nascent daughter cell. Only one of the  
815 two nascent daughter cells in telophase is plotted. The percentage of staining for CD107a  
816 in the presented cell (*x axis*) is plotted against the percentage of staining for total cell  
817 proteins (CTV, *y axis*). Asymmetric cells were defined as cells in telophase in which  
818 repartition of CD107a in the nascent daughter cells was beyond the 40-60% observed for  
819 CTV repartition (n=908 from 3 independent experiments). Right panel: example of  
820 asymmetric and symmetric cell distribution of CD107a, as detected by Imaging Flow  
821 Cytometry. (B) Left panel: The percentage of staining for perforin in the presented nascent  
822 daughter cell is plotted as in panel A. Asymmetric cells were defined as indicated in panel  
823 A (n=191 from 3 independent experiments). Right panel: example of asymmetric and  
824 symmetric cell distribution of perforin. (C) Left panel: The percentage of staining for GrzB  
825 in the presented nascent daughter cell is plotted as in panel A. Asymmetric cells were  
826 defined as indicated in panel A (n=728 from 3 independent experiments). Right panel:  
827 example of asymmetric and symmetric cell distribution of GrzB. (D) Left panel: The  
828 percentage of staining for CD107a is plotted as in panel A. Asymmetric cells were defined  
829 as indicated in panel A (n=352 from 3 independent experiments). Right panel: example of  
830 asymmetric and symmetric cell distribution of CD107a.

831 Numbers highlighted in blue in the plots indicate the % of cells exhibiting asymmetric  
832 repartition of the marker of interest. Red lines indicate the global distribution of the data.  
833 Red numbers indicate the slope of the linear regression curve for marker distribution. See  
834 Figure S1, S2, S3 and S4.

835

836 **Figure 2: CD107a<sup>+</sup> vesicles uneven segregation in telophase is confirmed by confocal**  
837 **laser scanning microscopy.** Freshly isolated polyclonal CD8<sup>+</sup> T cells were stimulated by  
838 immobilized anti-CD8/anti-CD28/ICAM-1 during 72h and stained with antibodies directed  
839 against CD107a. Cells in telophase were identified using confocal laser scanning  
840 microscopy. **(A)** Analysis of CD107a repartition in dividing cells. The fold increase of  
841 CD107a staining in the brighter nascent daughter cell as compared to the other nascent  
842 daughter cell is shown. The dotted red line indicates the limit between symmetric and  
843 asymmetric cells (1,5 fold increase, corresponding to a 60-40% variation) (n=61 from 2  
844 independent experiments). Each dot represents one CD8<sup>+</sup> T cell in telophase. **(B)** Example  
845 of an asymmetric cell in division. Green CD107a, cyan DAPI, red Tubulin. A maximum  
846 intensity projection (MIP) of a z-stack of images (left panel) and one z-section (right panel)  
847 are shown. See Movie 1.

848

849 **Figure 3: Fate determining transcription factors do not undergo uneven distribution**  
850 **in telophase.** Freshly isolated polyclonal CD8<sup>+</sup> T cells were stimulated by immobilized  
851 anti-CD8/anti-CD28/ICAM-1 during 72h and stained with antibodies directed against T-  
852 bet **(A)** or c-Myc **(B)**. **(A)**: T-bet analysis (n=926 from 3 independent experiments). **(B)**: c-  
853 Myc analysis (n=703 from 3 independent experiments).

854 Numbers highlighted in blue in the plots indicate the % of cells exhibiting asymmetric  
855 repartition of the marker of interest. Red lines indicate the global distribution of the data.  
856 Red numbers indicate the slope of the linear regression curve for marker distribution.

857

858 **Figure 4: A polarity cue is not necessary for asymmetric repartition of lytic**  
859 **machinery. (A)** Freshly isolated polyclonal CD8<sup>+</sup> T cells were stimulated using  
860 immobilized anti-CD8/anti-CD28/ICAM-1 (left) or with PMA/ionomycin (right) during  
861 72 hours and stained with antibodies directed against CD107a. Each dot represents one  
862 nascent daughter cell. Only one of the two nascent daughter cells in telophase that were  
863 identified by Imaging Flow Cytometry is plotted. The percentage of staining for CD107a  
864 in the presented nascent daughter cell (*x axis*) is plotted against the percentage of staining  
865 for total cell proteins (CTV, *y axis*). Asymmetric cells were defined as in Figure 1. Left:  
866 CD107a analysis when cells were stimulated with immobilized stimuli (n=1185 from 3  
867 independent experiments). Right: CD107a analysis when cells were stimulated with  
868 PMA/ionomycin (n=644 from 3 independent experiments). Numbers highlighted in blue  
869 in the plots indicate the % of cells exhibiting asymmetric repartition of the marker of  
870 interest. Red lines indicate the global distribution of the data. Red numbers indicate the  
871 slope of the linear regression curve for CD107a distribution. **(B)** Histograms represent the  
872 mean and standard deviation of the percentage of asymmetric cells in the 3 independent  
873 experiments. No statistical difference was revealed by paired t-test.

874

875

876

877 **Figure 5: Asymmetric repartition of CD107a<sup>+</sup> vesicles reset at each division event.**

878 **(A, B)** Freshly isolated polyclonal CD8<sup>+</sup> T cells were stimulated using immobilized anti-  
879 CD8/anti-CD28/ICAM-1 during 72h and stained with antibodies directed against CD107a.  
880 Cells in telophase were identified by Imaging Flow Cytometry. The number of divisions  
881 accomplished and the cell cycle phase were determined on the basis of CTV and SYTOX  
882 nuclear staining. **(A)** Each dot represents one nascent daughter cell. Only one of the two  
883 nascent daughter cells in telophase that were identified by Imaging Flow Cytometry is  
884 plotted. The percentage of staining for CD107a in the presented nascent daughter cell (*x*  
885 *axis*) is plotted against the percentage of staining for total cell proteins (CTV, *y axis*).  
886 Asymmetric cells were defined as in Figure 1. Numbers highlighted in blue in the plots  
887 indicate the % of cells exhibiting asymmetric repartition of the marker of interest. Red lines  
888 indicate the global distribution of the data. Red numbers indicate the slope of the linear  
889 regression curve for CD107a distribution. See Figure S3. **(B)** Histograms represent the  
890 mean and standard deviation of the percentage of asymmetric cells in 3 independent  
891 experiments. No statistical difference was revealed by paired t-test.

892 **(C, D)** Statistical analysis of cells in telophase and in G1. **(C)** Cells in telophase are plotted  
893 against their CD107a FI. The different curves represent cells having undergone 0, 1 or 2  
894 mitoses. Each dot indicates one cell undergoing asymmetric CD107a repartition as  
895 compared to its CD107a FI. The  $\chi^2$  statistical test showed that cells undergoing uneven  
896 repartition of lytic machinery in telophase were randomly distributed all over the CD107a  
897 expression curves (See Materials and Methods section). **(D)** Plots show cells in G1 from  
898 three different experiments. Curves represent the distribution of CD107a fluorescence  
899 intensity for all cells in G1. Individual plots, marked with different colors, show cells in

900 G1 at different rounds of division. The Kolmogorov-Smirnov goodness of fit test rejected  
901 the hypothesis that the CD107a expression curves follow the same distribution at the  
902 different division round (See Supplementary Results). The  $\chi^2$  test showed that variability  
903 was distributed all over the curves. See Figure S3.

904

905 **Figure 6: Lytic granules randomly distribute on the two sides of the cleavage furrow**  
906 **(A and B)** Snapshots depict typical cells in division undergoing even **(A)** or uneven **(B)**  
907 repartition of lytic granules (mCherry-tagged GrzB, red) in telophase as detected by live  
908 cell imaging. Images are from Movie 2 and 3 respectively. Results are from 3 independent  
909 experiments. **(C and D)** Snapshots depict Imaris software reconstructions of typical cells  
910 undergoing even **(D)** or uneven **(E)** repartition of LTR<sup>+</sup> (red) lytic granules in division as  
911 detected by 4D live cell imaging. Images are from Movie 4 and 5 respectively. Results are  
912 from 4 independent experiments. See Movies 4-6. **(E)** Binomial modeling for the behavior  
913 of the population of n granules. The curve shows the probability of lytic granule  
914 asymmetric repartition in telophase as a function of lytic granule number.

915

916 **Figure 7: CTL expressing high level of lytic granules have better killing capability.**  
917 Clonal CTL were FACS-sorted on the basis of their LysoTracker Blue staining. **(A)**  
918 Representative FACS histograms showing LysoTracker Blue staining levels on  
919 LysoTracker<sup>high</sup> and LysoTracker<sup>low</sup> sorted-CTL at the indicated day (D) after cell sorting.  
920 Numbers indicate mean fluorescence intensity. Results are representative of 3 independent  
921 experiments **(B-C)** LysoTracker<sup>High</sup> and LysoTracker<sup>Low</sup> CTL-mediated cytotoxicity was  
922 evaluated by FACS analysis by measuring 7-AAD uptake in target cells either pulsed or

923 not with antigenic peptide following overnight incubation with CTL at the indicated E/T  
924 ratio. **(B)** Cytotoxicity is expressed as the % of 7-AAD<sup>+</sup>-pulsed target cells minus % of 7-  
925 AAD<sup>+</sup>-unpulsed target cells (basal). Results are from 3 independent experiments. Each dot  
926 represents results from one experiment performed in triplicate. Means +/- SEM are shown.  
927 Paired t-tests were performed and P-values are indicated. **(C)** Histograms shown are from  
928 one representative experiment. Numbers indicate the percentage of 7-AAD positive target  
929 cells.

930 **Supplementary figure legends**

931 **Figure S1: Gating strategy for Imaging Flow Cytometry (IsX) acquisition.** Based on  
932 the brightfield illumination, all events were plotted for their aspect ratio (length/width,  
933 equal 1 for perfectly round cells) and their area. Cells in telophase were defined as those  
934 exhibiting a low aspect ratio and a big area. The region of interest (gray) included cell  
935 doublets and cells in anaphase and telophase. Based on the intensity of DNA staining  
936 (represented in linear axis) cells in G2/M were selected. We then applied a mask on the  
937 IsX image gallery (as described in material and methods section) to define the limits of the  
938 nuclei. This strategy was used to determine the number of nuclei present in each gated cell.  
939 To unambiguously identify cells in telophase we applied a mask on  $\alpha$ -tubulin staining  
940 allowing to detect condensed microtubules in an elongated shape (as described in material  
941 and methods section). This procedure allowed us to detect the midbody (a structure  
942 characteristic of telophase formed by highly condensed  $\alpha$ -tubulin that bridges the 2 nascent  
943 daughter cells). Cells included the described gates were finally visually inspected. All the  
944 cells recognized as in telophases on the basis of nuclear and tubulin staining were included  
945 in the analysis of the markers of interest.

946

947 **Figure S2 : Analysis and representation of the repartition of markers of interest in**  
948 **dividing cells (A)** Analysis of individual cells in telophase. All IsX generated TIFF files  
949 were analyzed using the Fiji software. For each telophase cell we used 3 TIFF image  
950 corresponding to: i) CTV staining; ii)  $\alpha$ -tubulin staining iii) and marker of interest. To  
951 standardize analysis, we used macro programming on Fiji (described in supplementary  
952 results section). To determine a rupture zone between the 2 nascent daughter cells we



953 applied watershed function on tubulin mask. The watershed masks were used to determine  
954 the 2 nascent daughter cells in which the fluorescence intensities of CTV and of the markers  
955 of interest were measured (yellow lines). **(B)** Example of a cell exhibiting asymmetric  
956 distribution in telophase of a marker of interest. The yellow lines highlight the nascent  
957 daughter cell exhibiting a higher content of the marker of interest.

958

959 **Figure S3 : CD8<sup>+</sup> T cells are efficiently stimulated on coated anti-CD3/anti-**  
960 **CD28/ICAM1.** Freshly isolated polyclonal CD8<sup>+</sup> T cells previously stained with CTV  
961 were stimulated 72 hours using immobilized anti-CD3/anti-CD28/ICAM1. **(A)** Imaging  
962 Flow Cytometry shows that stimulated cell undergo several rounds of division as shown  
963 by CTV staining dilution. **(B)** Flow cytometry shows upregulation of CD137 expression in  
964 stimulated cells.

965

966 **Figure S4 : Uneven lytic granule segregation in telophase in CD8<sup>+</sup> memory T cells.**  
967 The panels show staining for CD107a and perforin in human CD8<sup>+</sup> memory T cells  
968 stimulated and analyzed as in **Figure 1A-B**. CD107a n=978 from 3 independent  
969 experiments; perforin n=1127 from 3 independent experiments. Numbers highlighted in  
970 blue in the plots indicate the % of cells exhibiting asymmetric repartition of the marker of  
971 interest. Red lines indicate the global distribution of the data. Red numbers indicate the  
972 slope of the linear regression curve for marker distribution.

973

974 **Figure S5 : LysoTracker randomly distribute on the two sides of the cleavage furrow**

975 **(A and B)** Snapshots depict Imaris software reconstructions of typical cells undergoing  
976 uneven **(A)** and even **(B)** repartition of LTR<sup>+</sup> (red) lytic granules in division as detected by  
977 4D live cell imaging. Images are from Movie 6.

978

#### 979 **Movie legends**

980 **Movie 1: 3D visualization of CD107a repartition in a telaphasic CD8<sup>+</sup> T cell** The movie  
981 shows 3D reconstruction of a cell in telophase. CD107a (green),  $\alpha$ -tubulin (red) and DAPI  
982 (cyan). The images presented in **Figure 2B** has been extracted from this movie.

983

984 **Movie 2 and 3: Visualization by time-lapse confocal laser scanning microscopy of cell**  
985 **division.** Human CTL were transfected during their expansion phase with mcherryGrzB.  
986 18 hours after transfection, cells were inspected by time-lapse laser scanning confocal  
987 microscopy for additional 5-6 hours using a Tile Scan mode to enlarge the acquisition filed  
988 and to capture rare cells undergoing spontaneous division during the time of acquisition.  
989 Movie 2 shows a typical cell undergoing even repartition of GrzB<sup>+</sup> granules. Movie 3  
990 shows a typical cell undergoing uneven repartition of GrzB<sup>+</sup> granules. Snapshots of Movie  
991 2 and 3 are shown in **Figure 6 A and B.**

992

993 **Movie 4-6: Visualization by 4D time-lapse microscopy of cell division.** G2/M sorted  
994 CTL were loaded with Hoechst (blue) and LysoTracker Red (LTR, red) and inspected by  
995 time-lapse laser scanning confocal microscopy (movie 4-5) or spinning-disk microscopy  
996 (movie 6) for 12h-16h. **Movie 4** shows 4D reconstruction (using Imaris software) of a  
997 typical cell undergoing even repartition of LTR<sup>+</sup> granules. **Movie 5** movie shows 4D

998 reconstruction (using Imaris software) of a typical cell undergoing uneven repartition of  
999 LTR<sup>+</sup> granules. Snapshots of Movie 4 and 5 are shown in **Figure 6 C** and **D**. **Movie 6**  
1000 shows 4D reconstruction (using Imaris software) of one typical cell undergoing uneven  
1001 repartition of LTR<sup>+</sup> granules and one typical cell undergoing even repartition of LTR<sup>+</sup>  
1002 granules. Snapshots of Movie 6 are shown in **Figure S5**. Results are from 4 independent  
1003 experiments.

Figure 1

A

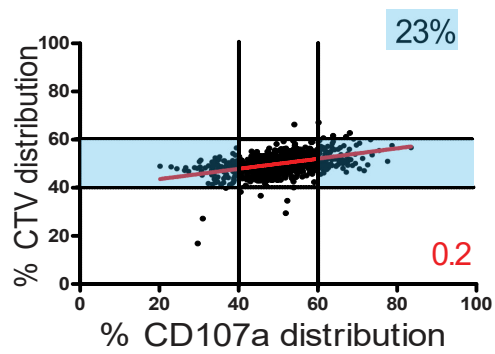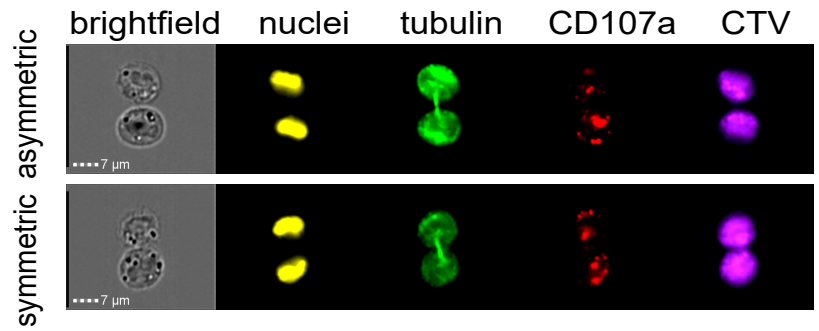

B

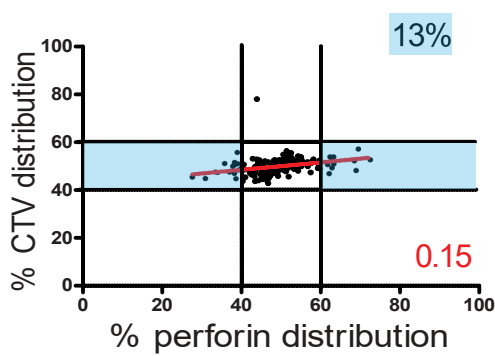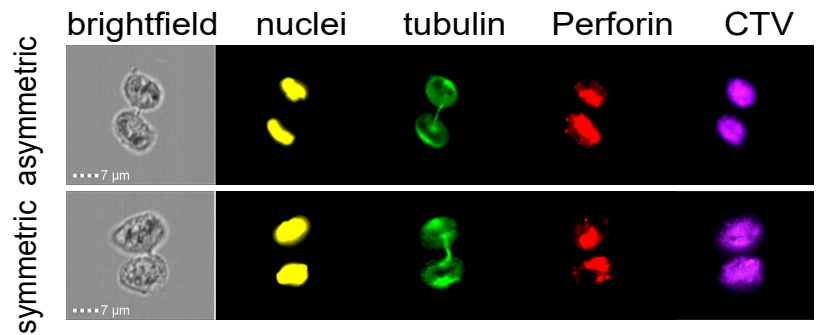

C

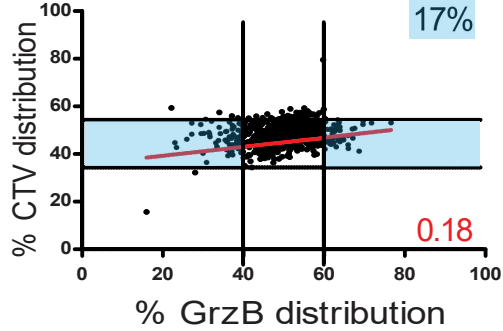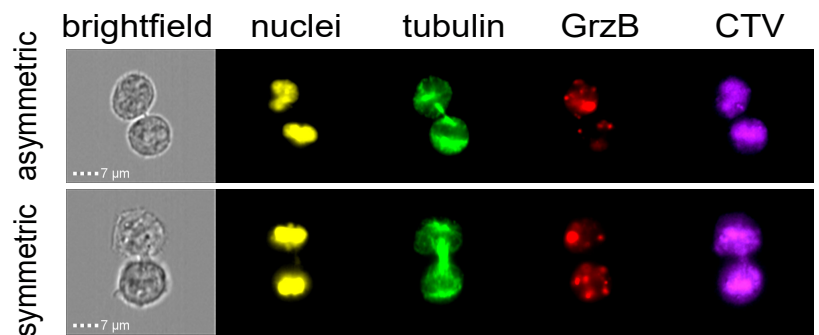

D

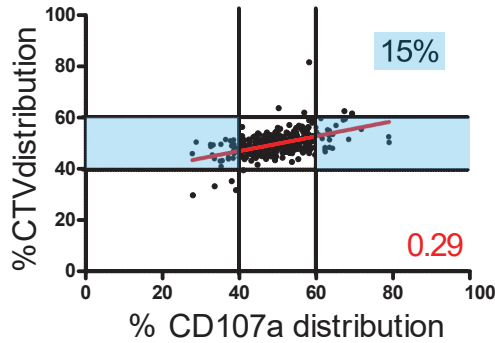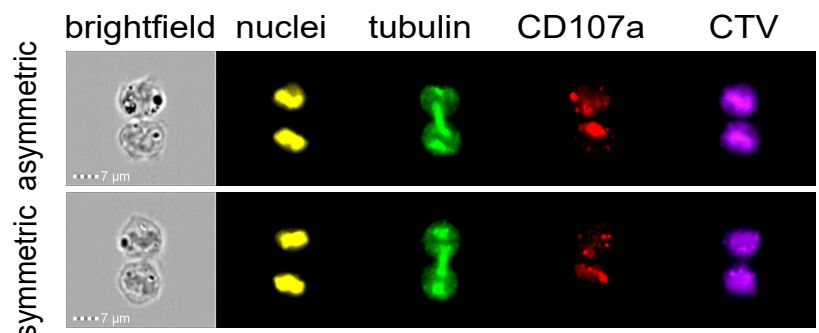

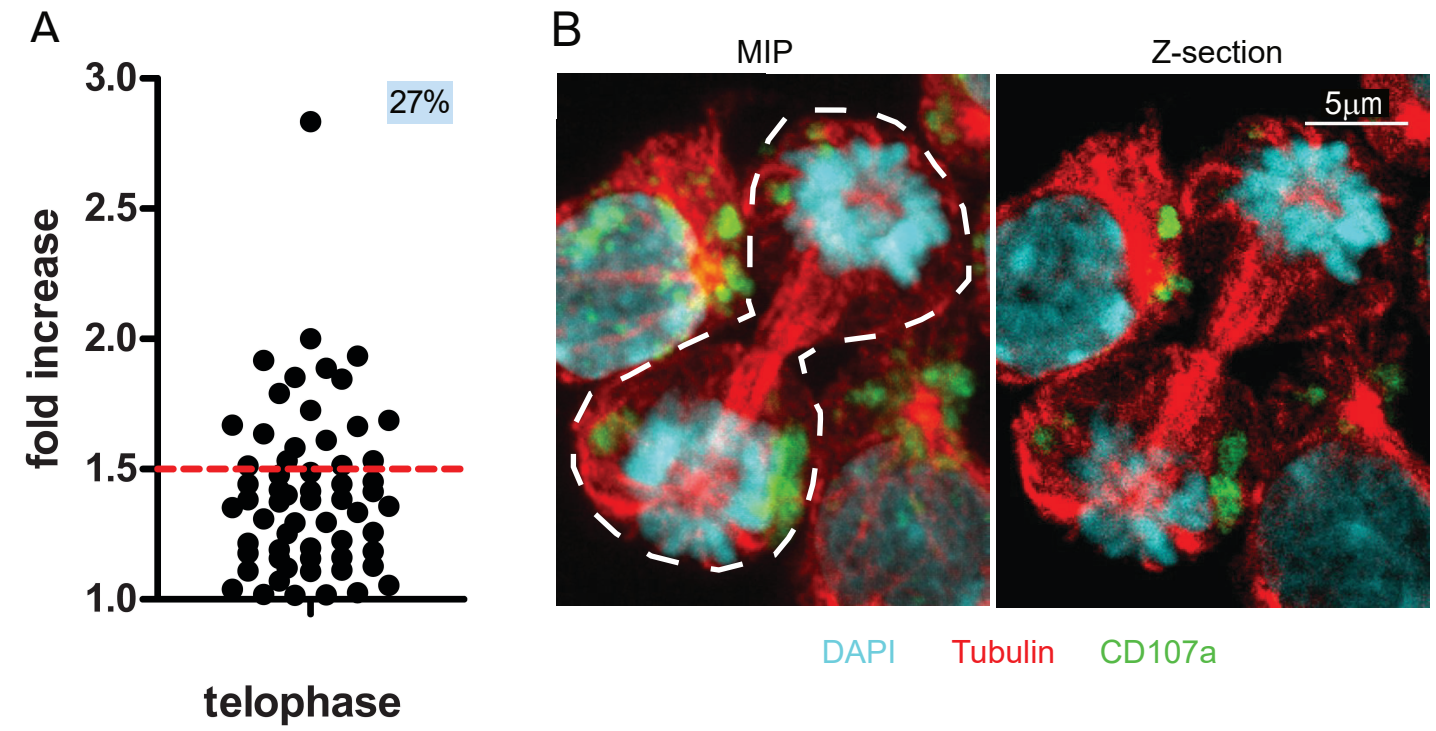

### Figure 3

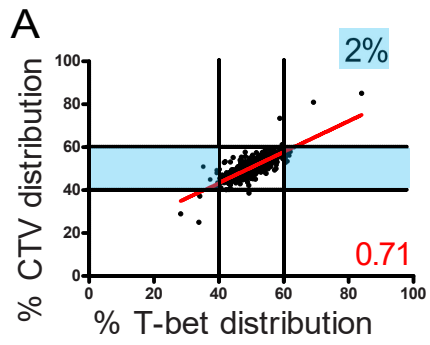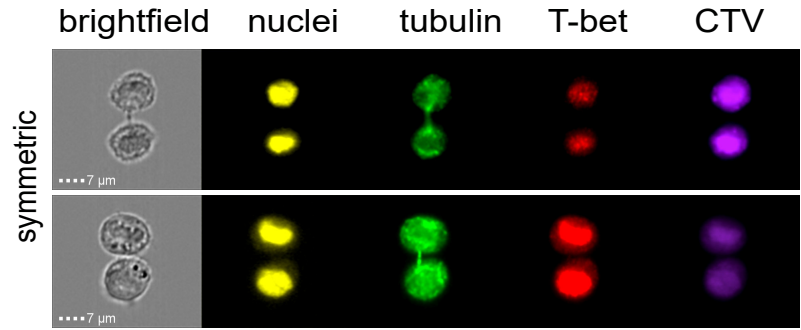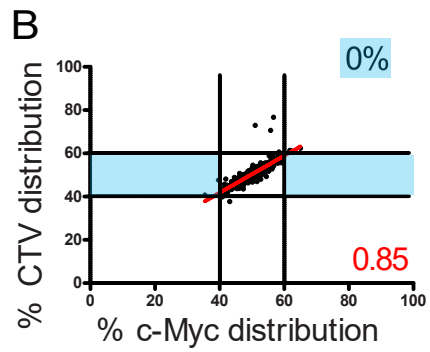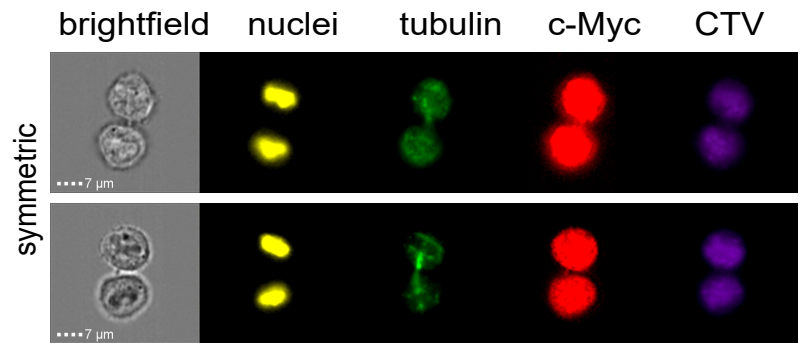

Figure 4

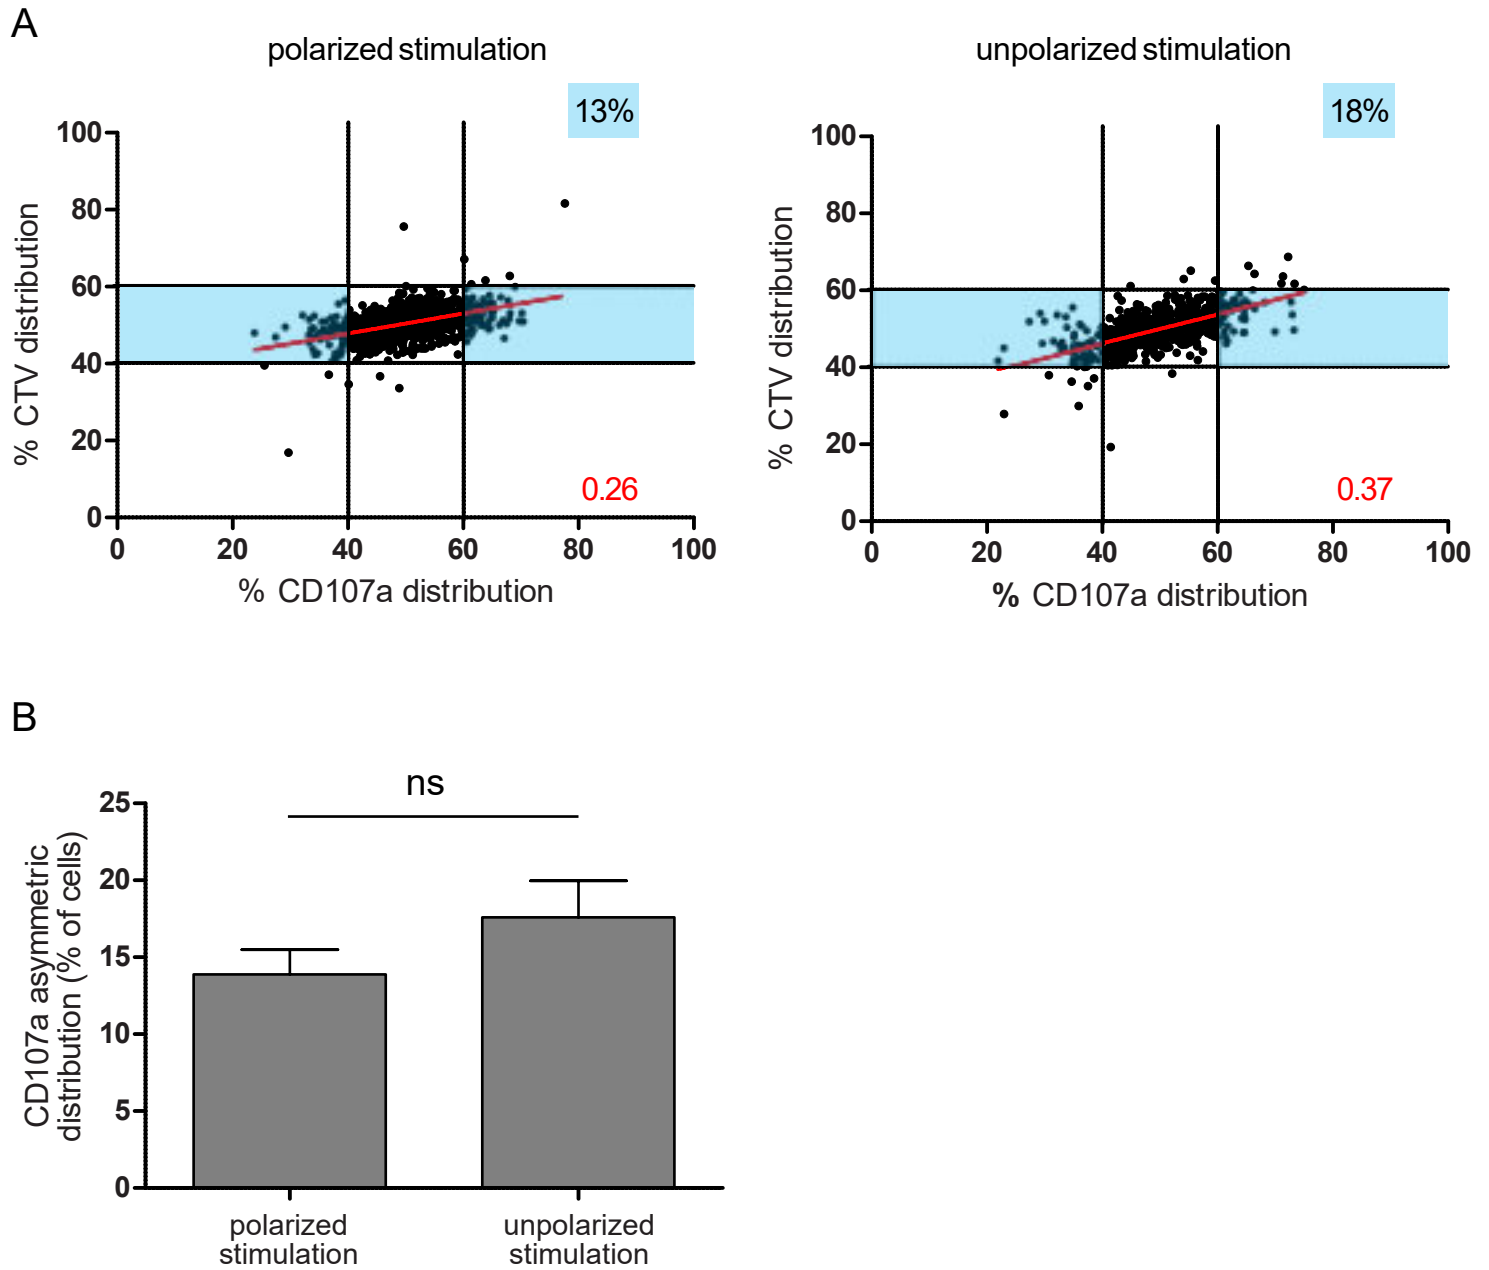

## Figure 5

A

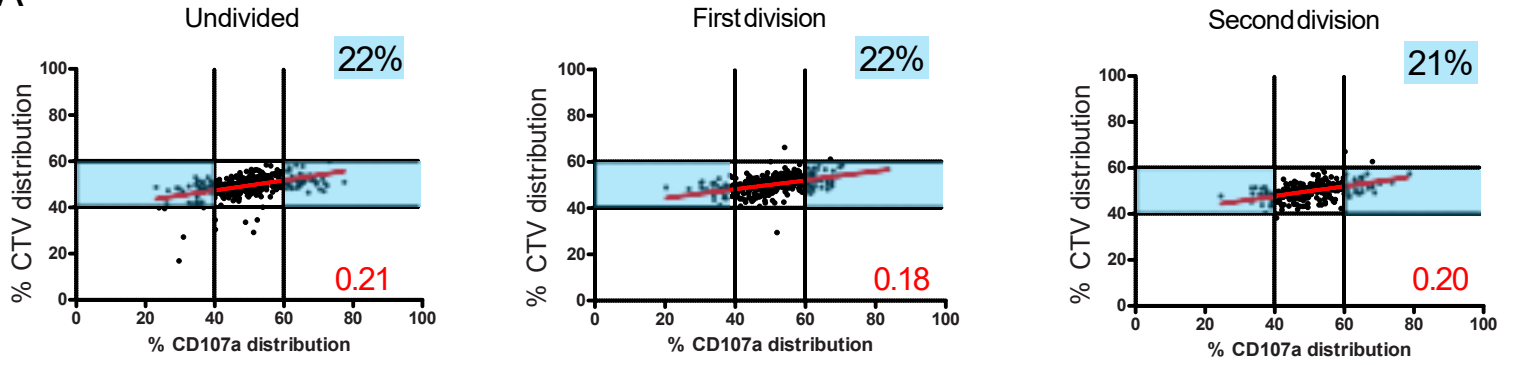

B

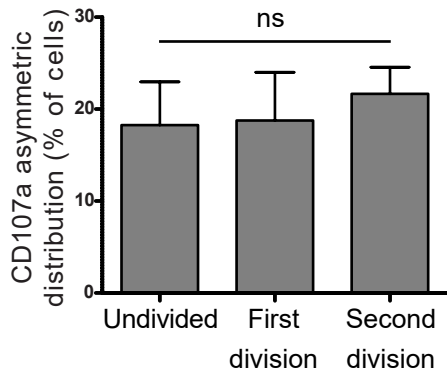

C

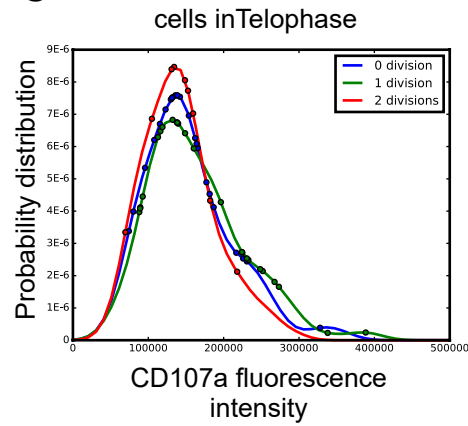

D

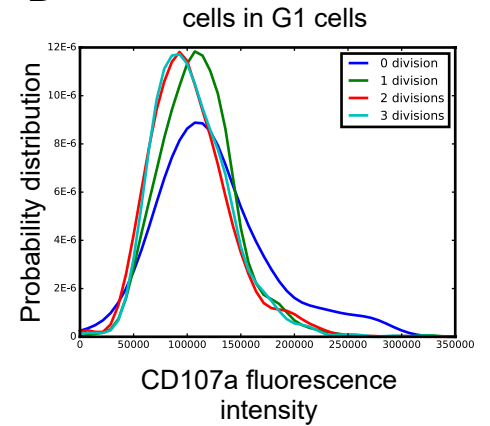



## Figure 6

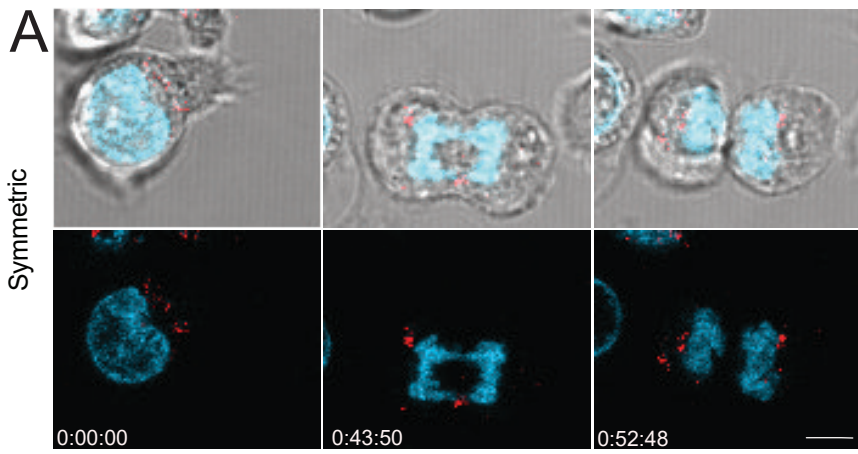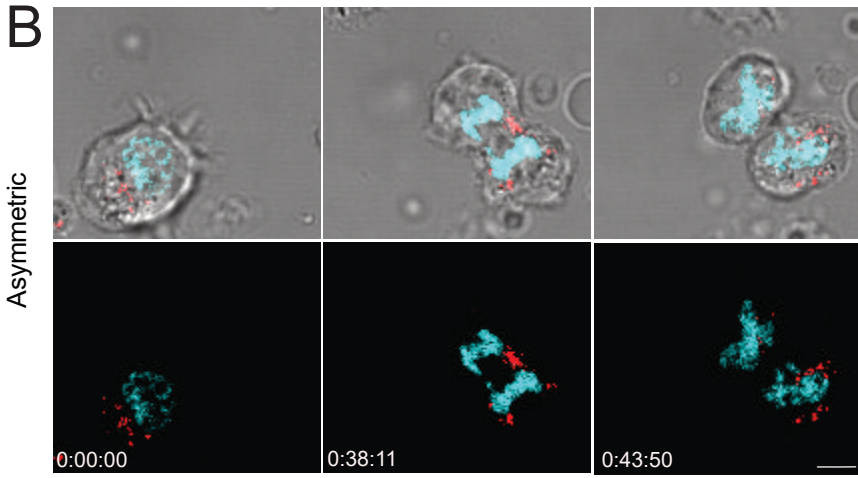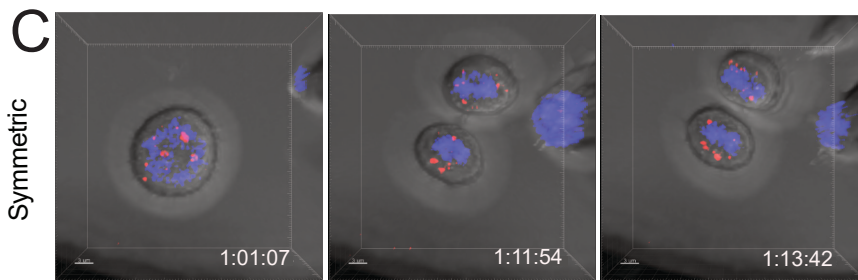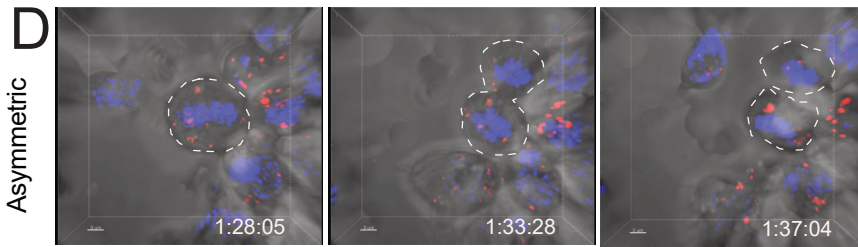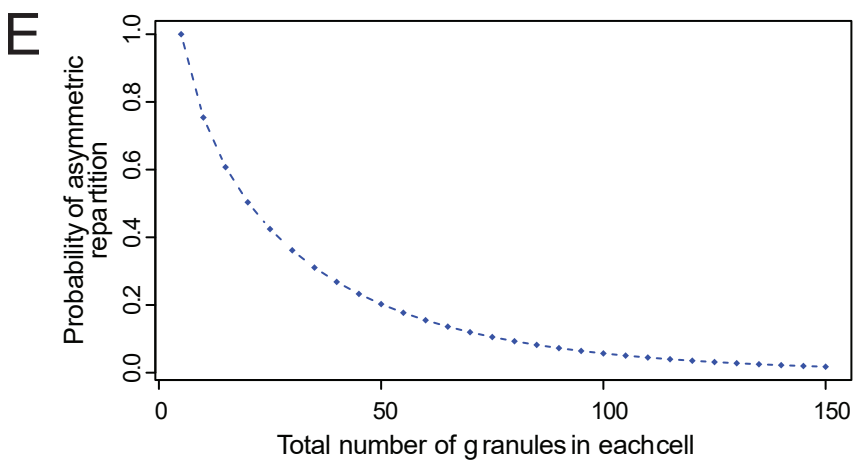

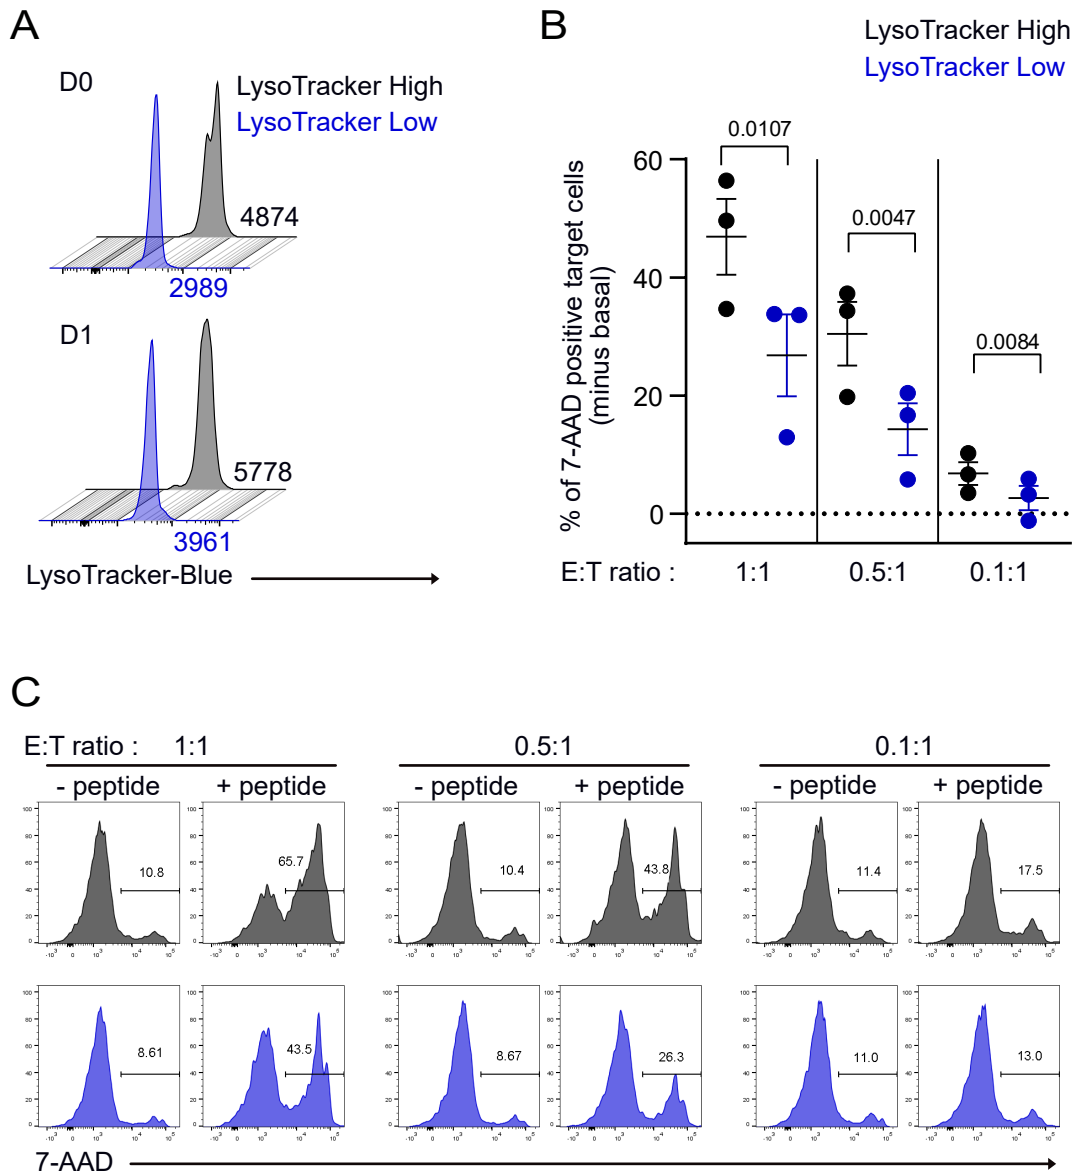

# Fig. S1

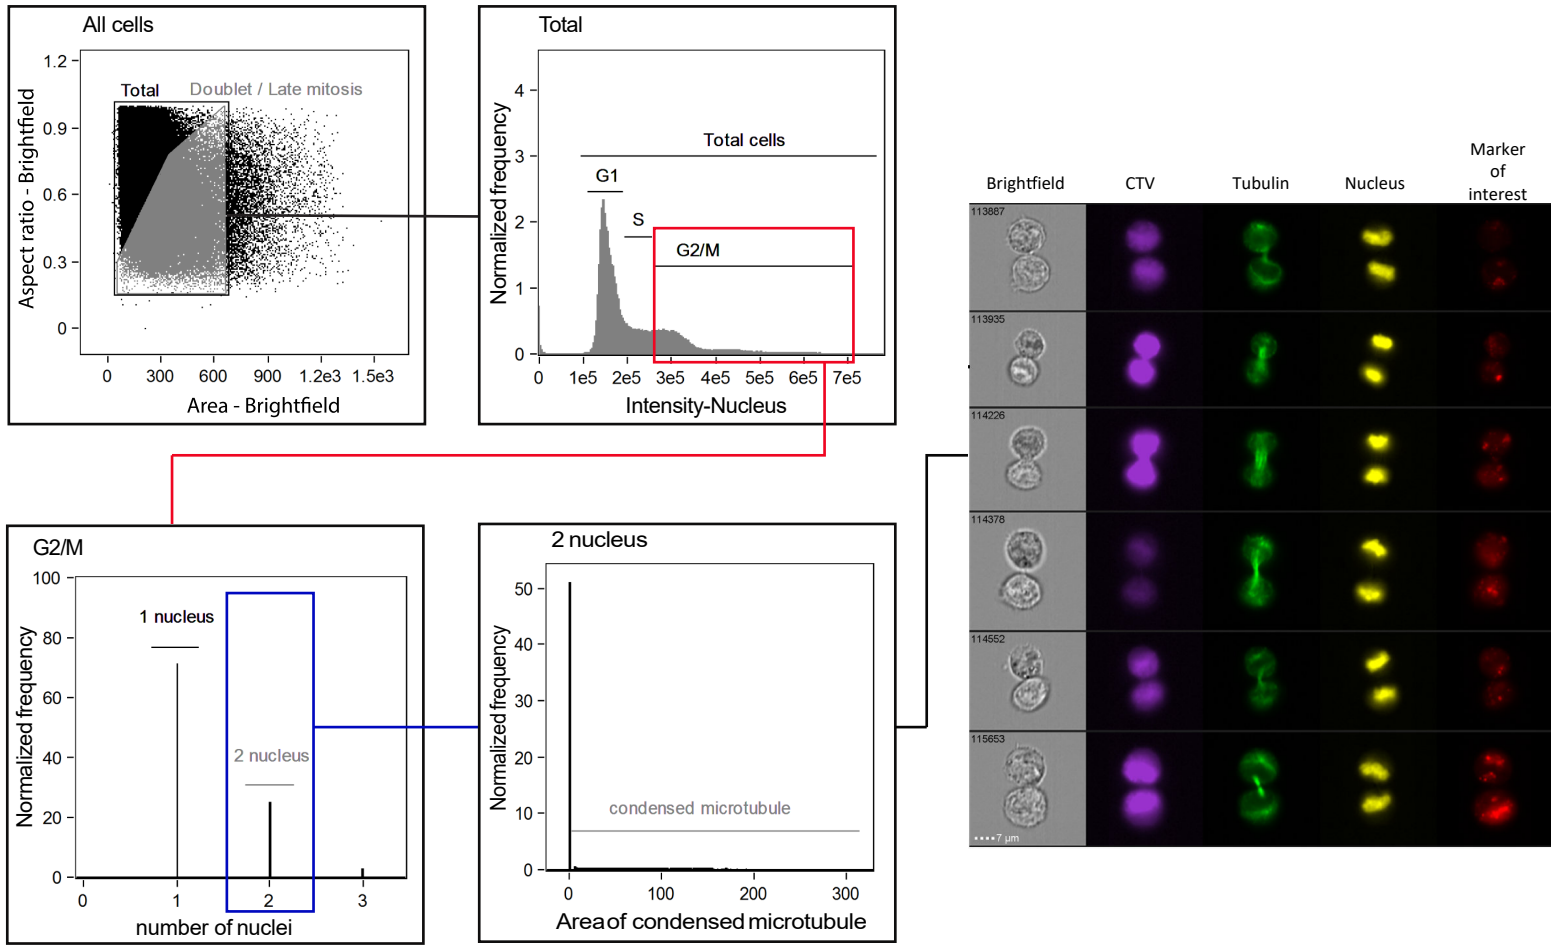

## Fig. S2

A

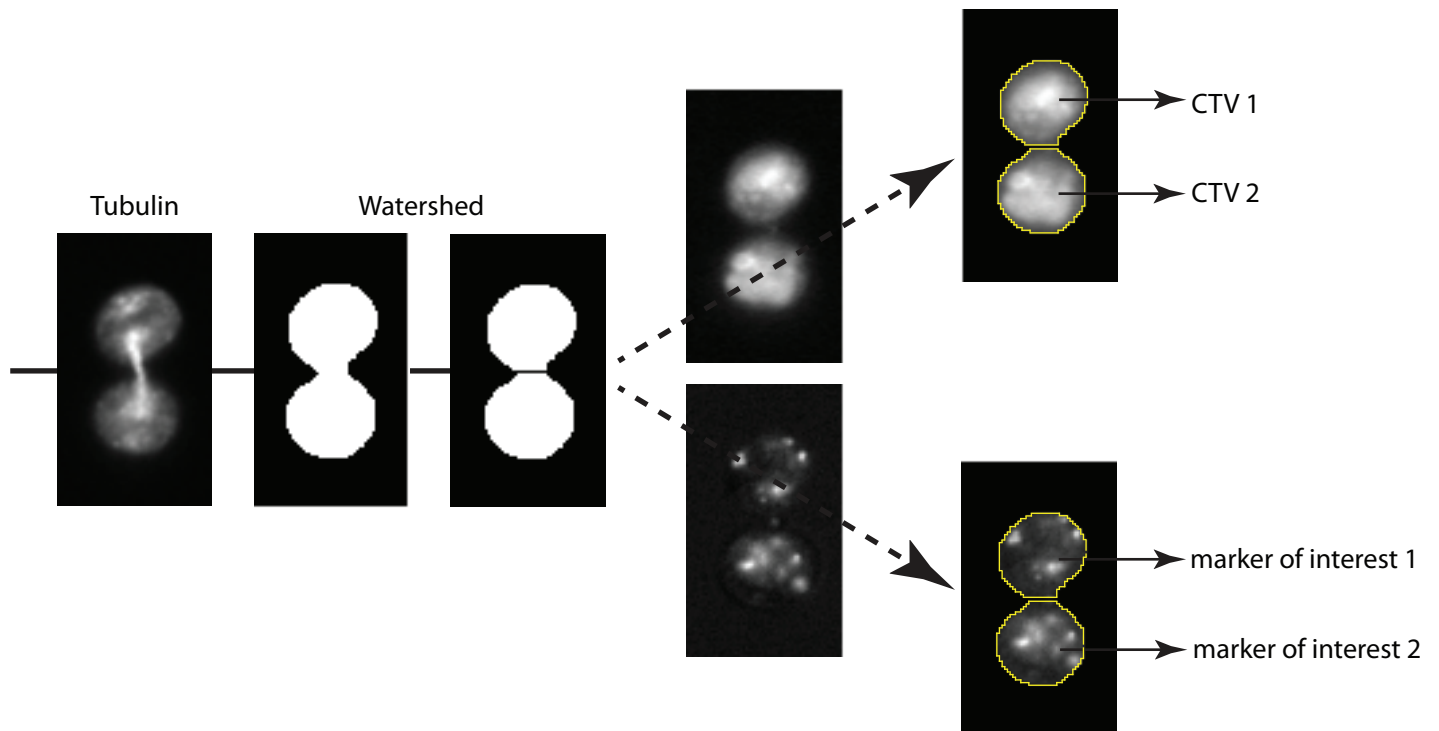

B

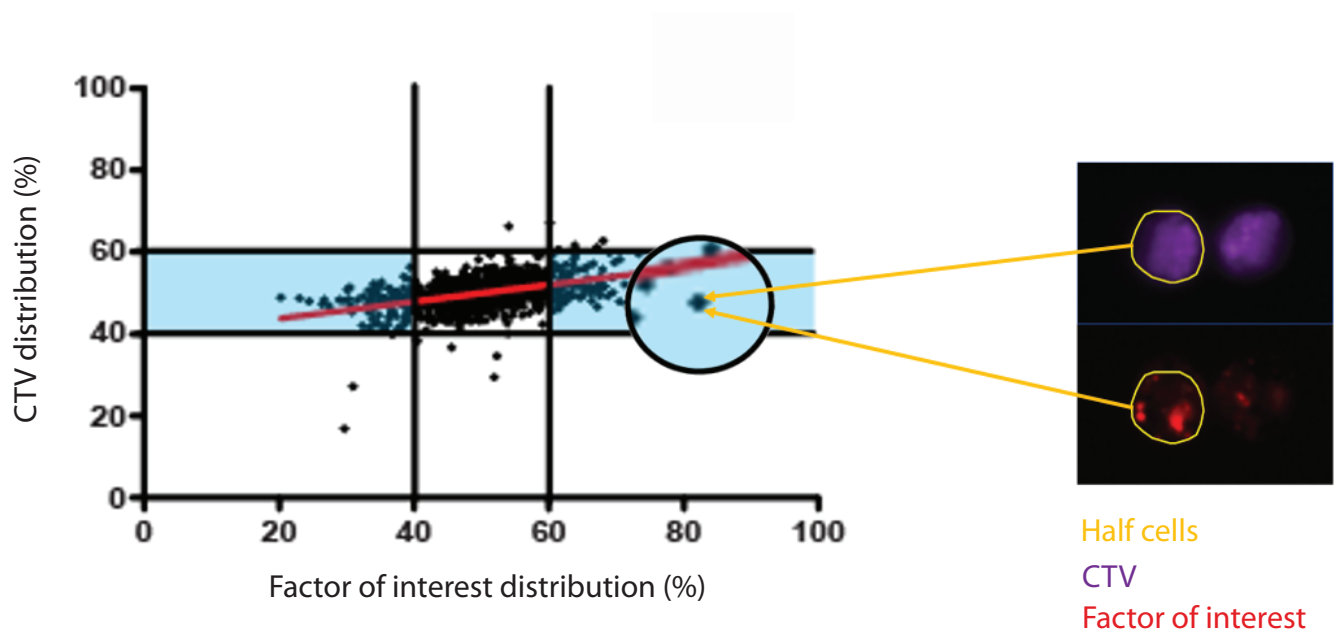

# Fig. S3

A

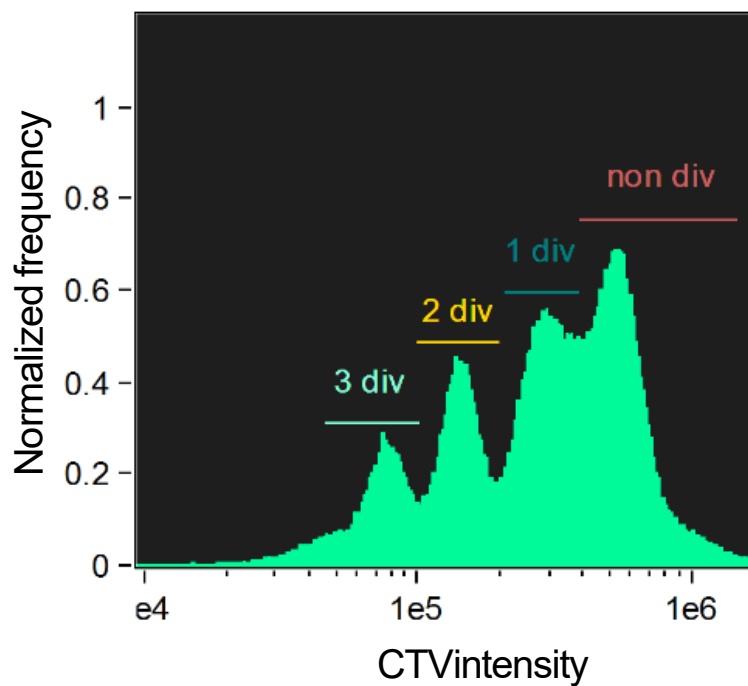

B

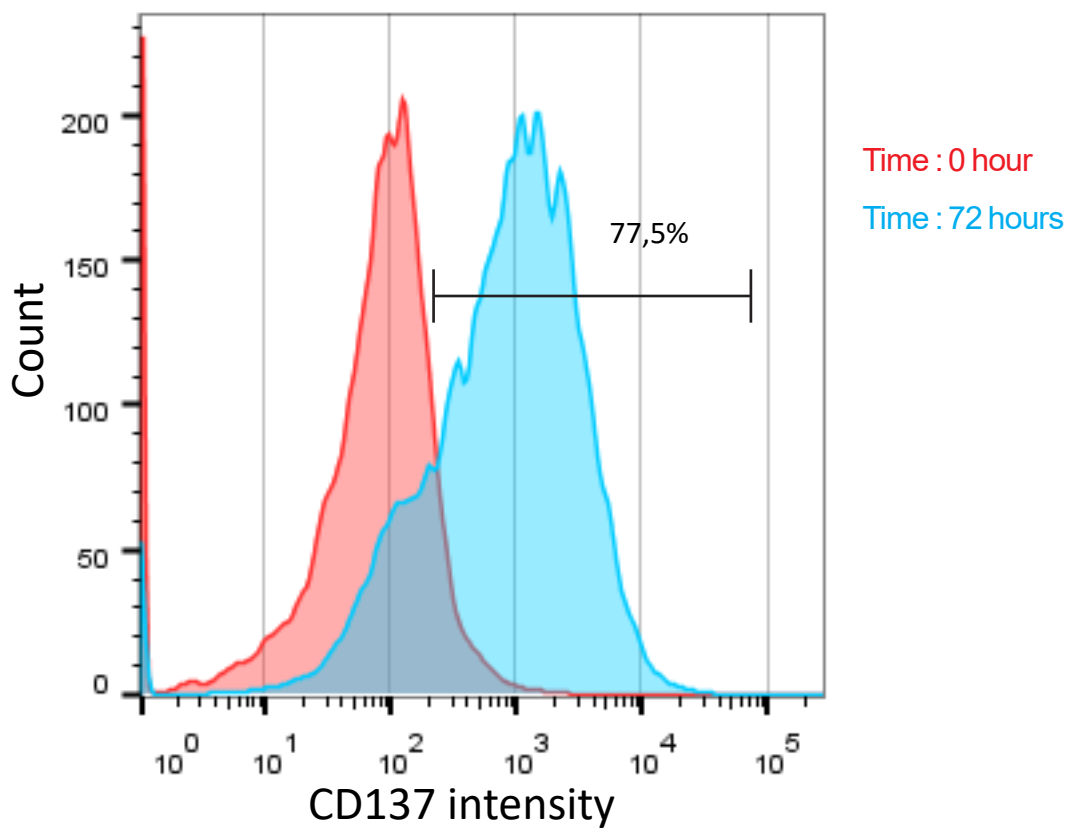

Fig. S4

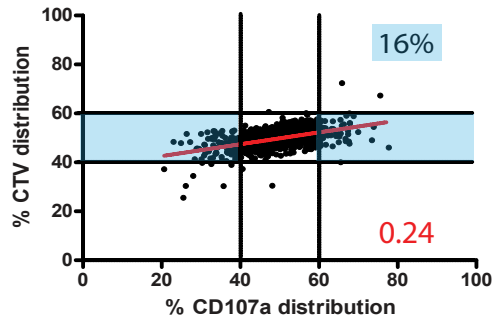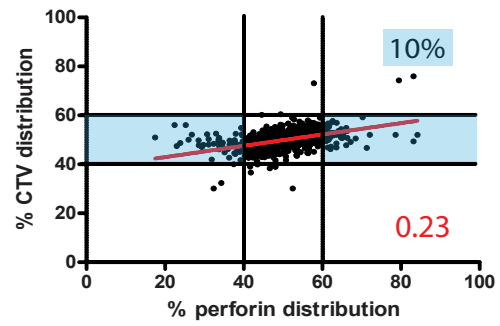

## Fig. S5

### A

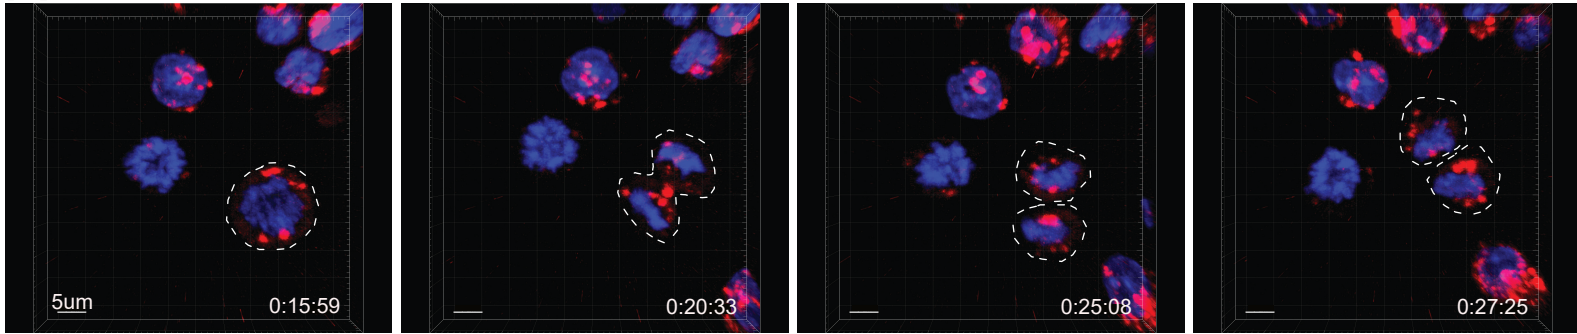

### B

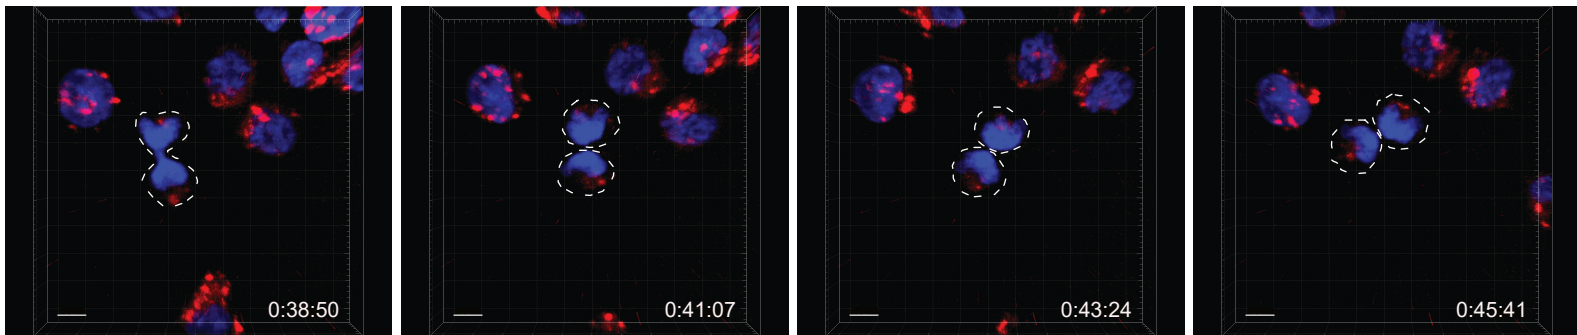

Source: https://biorxiv.org/content/10.1101/2020.09.08.287029v1.full.pdf
